# Supplementary material for: Effects of Acute Exposure to Polystyrene Nanoplastics on the Channel Catfish Larvae: Insights From Energy Metabolism and Transcriptomic Analysis
Source: Front Physiol. 2022 Jun 1;13:923278. doi: 10.3389/fphys.2022.923278 (PMC9198484; doi:10.3389/fphys.2022.923278)
Supplement: Supplementary file 1 [file Table2.XLSX]

## Sheet: Sheet1
Primer sequences and accession numbers used in real-time PCR validation
Gene name	Forward primer	Reverse sequence
18s ribosomal RNA	AACCTGGTTGATCCTGCCAGT	TGATCCTTCTGCAGGTTCACCTAC
PSMC3	GCTCCAACATGGTCCTCT	CCAAAGCGACATTCCTAA
HSP70	CGTTCAGTCCAGCAATCA	GAAGGAAATCGCAGAGGC
USP13	ATAACCCCAACCAACTCCTC	CACATACAACCCACCTTCTGA
DDIT4	AAGGAAAGAGCACTTAACCCG	GGAGCACAATCAACCCAAAC
ADH1	GGCTCCAGCGTTCTTACA	GAACCAGATTGCCGTGAC
P4502D15	TCCGTCCTATCTCCGCTCTGT	CTGTCCTGCCATGATTTCCCT
FADS2	TCACAGGGCTGATACACC	TTTAGAGGAAACCGAAGC
PPP1R3B	CGATGCCGCTTTATCTGTTG	CTCGGAGAAAATCTTCACCAC
