# Supplementary material for: Effects of Acute Exposure to Polystyrene Nanoplastics on the Channel Catfish Larvae: Insights From Energy Metabolism and Transcriptomic Analysis
Source: Front Physiol. 2022 Jun 1;13:923278. doi: 10.3389/fphys.2022.923278 (PMC9198484; doi:10.3389/fphys.2022.923278)
Supplement: Supplementary file 2 [file Table3.XLSX]

## Sheet: Sheet1
DEGs between NPs exposure and control groups
Gene ID	mean expression level in control group	mean expression level in NPs exposure group	Fold change	Padjusted	up_down	Description
psd13	925.975	2019.31	2.18074	1.76229e-06	Up	26S proteasome non-ATPase regulatory subunit 13
abat	639.087	1391.2	2.17685	0.000327841	Up	4-aminobutyrate aminotransferase
LOC108279203	3195.35	7345.4	2.29878	1.33667e-12	Up	4F2 cell-surface antigen heavy chain-like
LOC108268189	237.134	481.464	2.03034	0.000232976	Up	5-beta-cholestane-3-alpha,7-alpha-diol 12-alpha-hydroxylase-like
nt5dc4	264.551	1533.88	5.79805	9.28456e-45	Up	5'-nucleotidase domain containing 4
LOC100304664	503.218	1099.26	2.18446	0.00100298	Up	6-phosphofructo-2-kinase/fructose-2,6-bisphosphatase 4
LOC108254777	1189.35	2412.85	2.02871	3.47271e-09	Up	6-phosphofructo-2-kinase/fructose-2,6-bisphosphatase 4-like
abhd3	216.329	442.732	2.04656	1.24252e-06	Up	abhydrolase domain containing 3
acat2	169.201	498.959	2.94891	2.96006e-14	Up	acetyl-CoA acetyltransferase 2
ap4e1	269.243	597.739	2.22007	8.4415e-09	Up	adaptor related protein complex 4 epsilon 1 subunit
ampd3	775.383	2428.5	3.132	0.000119632	Up	adenosine monophosphate deaminase 3
adgrg2	467.39	945.918	2.02383	2.67876e-07	Up	adhesion G protein-coupled receptor G2
LOC108260527	234.153	665.287	2.84125	0.000534238	Up	ADP-ribosylation factor-like protein 5B
LOC108273807	93.2891	205.103	2.19857	1.59946e-05	Up	alanine aminotransferase 2-like
LOC108277671	412.206	3405.46	8.26155	1.44972e-45	Up	alpha-crystallin A chain-like
LOC108264598	1643.43	4188.51	2.54863	3.70489e-16	Up	AMP deaminase 3-like
LOC108277070	1544.01	3738.61	2.42136	1.6317e-14	Up	AN1-type zinc finger protein 5-like
LOC108276353	274.228	622.062	2.26841	2.84177e-09	Up	androgen-dependent TFPI-regulating protein-like
agtr1	13.6507	34.3794	2.51851	0.0354486	Up	angiotensin II receptor type 1
asb10	187.559	529.824	2.82483	1.22136e-13	Up	ankyrin repeat and SOCS box containing 10
LOC108280001	30.6974	158.65	5.1682	8.90376e-15	Up	ankyrin repeat and SOCS box protein 13-like
LOC108258099	4.38667	101.008	23.0261	3.92e-23	Up	ankyrin repeat and SOCS box protein 2-like
LOC108268446	24.186	86.5707	3.57937	9.67765e-07	Up	apoptosis-enhancing nuclease-like
arg2	1098.81	2356.09	2.14422	1.64958e-09	Up	arginase 2
LOC108268864	76.5915	357.215	4.6639	2.26685e-06	Up	arrestin-C-like
aipl1	18.4313	41.8669	2.27151	0.0357367	Up	aryl hydrocarbon receptor interacting protein like 1
ash1l	1068.04	3149.25	2.94861	2.2578e-20	Up	ASH1 like histone lysine methyltransferase
abcf1	534.424	1146.14	2.14462	1.50818e-09	Up	ATP binding cassette subfamily F member 1
LOC108264060	23.4469	53.2257	2.27005	0.0169279	Up	ATP-binding cassette sub-family C member 8-like
LOC108266791	315.634	757.886	2.40115	6.12738e-06	Up	ATP-dependent 6-phosphofructokinase, liver type-like
LOC108271041	9.20183	31.5067	3.42396	0.0278624	Up	atrial natriuretic peptide receptor 2-like
aire	8.34534	48.0291	5.7552	2.27795e-06	Up	autoimmune regulator
LOC108264054	739.168	3243.46	4.38799	6.68782e-20	Up	autophagy-related protein 9A-like
LOC108258431	19.958	45.1561	2.26256	0.027943	Up	B-cell receptor CD22-like
bag3	608.253	2038.5	3.35141	5.93756e-18	Up	BCL2 associated athanogene 3
bnip3	582.157	1798.92	3.0901	7.71874e-21	Up	BCL2 interacting protein 3
best3	118.407	611.227	5.16207	6.48477e-31	Up	bestrophin 3
bckdk	551.655	1399.02	2.53605	3.31398e-14	Up	branched chain ketoacid dehydrogenase kinase
brap	475.051	998.958	2.10284	1.09772e-08	Up	BRCA1 associated protein
bscl2	156.656	345.829	2.20757	6.15192e-07	Up	BSCL2, seipin lipid droplet biogenesis associated
LOC108255279	1218.51	7815.93	6.41432	4.13934e-59	Up	calcium-binding and coiled-coil domain-containing protein 1-like
LOC108256200	10.283	27.1444	2.63973	0.0488358	Up	C-C motif chemokine 19-like
cebpd	2462.39	7116.22	2.88996	9.04083e-16	Up	CCAAT/enhancer binding protein delta
LOC108265421	2101.22	5723.18	2.72374	2.50597e-09	Up	CCAAT/enhancer-binding protein beta-like
LOC108263078	341.63	1219.53	3.56974	2.15821e-16	Up	CD276 antigen-like
LOC108280891	9087.45	29058	3.1976	4.948e-18	Up	CD59 glycoprotein-like
LOC108276423	144.286	606.99	4.20684	1.30127e-24	Up	CDK5 and ABL1 enzyme substrate 2-like
cdv3	1216.71	2830.03	2.32598	6.27656e-13	Up	CDV3 homolog
LOC108263784	77.2835	193.551	2.50443	0.00644498	Up	cell wall protein DAN4-like
chac2	126.352	315.267	2.49516	1.00739e-08	Up	ChaC cation transport regulator homolog 2
chac1	611.149	3045.18	4.98271	2.61402e-19	Up	ChaC glutathione specific gamma-glutamylcyclotransferase 1
clcn2	32.6727	76.2535	2.33386	0.00258256	Up	chloride voltage-gated channel 2
c1h16orf91	57.1833	127.87	2.23615	0.000586933	Up	chromosome 1 open reading frame, human C16orf91
c14h11orf96	433.203	1225.89	2.82982	4.91274e-07	Up	chromosome 14 open reading frame, human C11orf96
c2h16orf72	199.176	425.165	2.13463	3.79135e-07	Up	chromosome 2 open reading frame, human C16orf72
c24h1orf109	67.798	144	2.12396	0.000343036	Up	chromosome 24 open reading frame, human C1orf109
LOC108262248	15.2086	46.6124	3.06486	0.0349662	Up	cingulin-like
LOC108268068	110.588	368.653	3.33358	6.85289e-15	Up	claudin-7-A
ccser2	178.335	386.899	2.16951	3.1458e-05	Up	coiled-coil serine rich protein 2
LOC108277693	141.739	320.886	2.26392	3.42975e-07	Up	collagen alpha-4(IV) chain-like
LOC108277694	246.471	535.894	2.17426	0.000162176	Up	collagen alpha-5(IV) chain-like
LOC108276914	288.507	641.604	2.22388	0.0114222	Up	collagenase 3-like
LOC108276915	809.487	2224.29	2.74778	5.8962e-05	Up	collagenase 3-like
c7	3267.46	8624.88	2.63962	0.00971356	Up	complement component 7
cpox	325.106	680.217	2.09229	4.62922e-08	Up	coproporphyrinogen oxidase
LOC108269229	983.828	2076.49	2.11063	5.59043e-10	Up	cryptochrome-2-like
LOC108266148	1249.85	4248.09	3.39889	1.12197e-26	Up	C-type lectin domain family 4 member E-like
LOC108260679	2.30735	15.6528	6.78386	0.00870402	Up	C-X-C motif chemokine 2-like
cdkn1a	100.75	380.24	3.7741	5.58581e-18	Up	cyclin dependent kinase inhibitor 1A
csrnp1	468.036	1143.86	2.44397	1.40668e-12	Up	cysteine and serine rich nuclear protein 1
LOC108279700	127.556	438.181	3.43521	1.53164e-16	Up	cystine/glutamate transporter-like
LOC108257834	32.5997	75.6235	2.31976	0.00255184	Up	cytochrome c oxidase subunit 8A, mitochondrial-like
LOC108278403	144.376	296.02	2.05034	1.03165e-05	Up	cytochrome c-type heme lyase-like
LOC108254847	404.546	872.087	2.15572	3.93054e-09	Up	cytokine-inducible SH2-containing protein-like
LOC108274028	235.196	707.439	3.00788	1.60198e-16	Up	cytoplasmic phosphatidylinositol transfer protein 1-like
dhx30	72.1777	153.102	2.12118	0.000224877	Up	DEAH-box helicase 30
LOC108276818	301.516	743.303	2.46522	0.0019527	Up	dehydrogenase/reductase SDR family member 13-like
LOC108261400	46.6098	99.54	2.1356	0.0021861	Up	deleted in malignant brain tumors 1 protein-like
ddit4	648.696	4492.56	6.92553	8.16002e-22	Up	DNA damage inducible transcript 4
LOC108263660	6.59393	49.8539	7.56058	6.29956e-08	Up	DNA damage-inducible transcript 4 protein-like
LOC108272317	104.578	366.598	3.50551	3.59044e-16	Up	DNA-directed RNA polymerase III subunit RPC7-like
dnajb1	385.633	1989.81	5.15985	6.60475e-42	Up	DnaJ heat shock protein family (Hsp40) member B1
dnajc3	123.555	271.138	2.19446	0.00144802	Up	DnaJ heat shock protein family (Hsp40) member C3
LOC108279271	82.7961	318.159	3.84267	1.06042e-10	Up	dnaJ homolog subfamily B member 5-like
LOC108262454	163.712	342.886	2.09444	0.000481722	Up	docking protein 2-like
LOC108254838	82.3331	181.257	2.20151	4.03594e-05	Up	Down syndrome cell adhesion molecule-like
dusp1	872.811	3049.78	3.49421	4.7351e-27	Up	dual specificity phosphatase 1
dusp5	104.525	323.796	3.09778	7.93454e-13	Up	dual specificity phosphatase 5
LOC108265928	336.926	849.107	2.52016	1.20753e-06	Up	dual specificity protein phosphatase 2-like
LOC108270676	448.274	968.211	2.15986	2.8206e-09	Up	E3 ubiquitin-protein ligase arih1
LOC108268348	266.222	889.981	3.343	0.000166772	Up	E3 ubiquitin-protein ligase RNF182-like
egr1	1927.5	7088.41	3.67751	1.19076e-30	Up	early growth response 1
egr3	186.34	948.844	5.092	1.61342e-13	Up	early growth response 3
LOC108275472	29.2635	111.384	3.80624	0.000623609	Up	early growth response protein 1-like
LOC108269483	29.764	242.39	8.14372	5.53411e-28	Up	early growth response protein 2b-like
egln3	164.814	383.338	2.32589	0.00269594	Up	egl-9 family hypoxia inducible factor 3
elp2	190.734	394.277	2.06715	1.46125e-06	Up	elongator acetyltransferase complex subunit 2
elovl2	406.844	816.175	2.00611	0.00177967	Up	ELOVL fatty acid elongase 2
emb	266.905	589.089	2.20712	1.78778e-06	Up	embigin
emg1	269.188	545.03	2.02472	5.827e-07	Up	EMG1, N1-specific pseudouridine methyltransferase
ece2	5.75447	20.1972	3.50983	0.0382727	Up	endothelin converting enzyme 2
epgn	105.051	243.87	2.32145	8.21511e-07	Up	epithelial mitogen
LOC108271058	60.5924	122.314	2.01863	0.00171855	Up	equilibrative nucleoside transporter 1-like
LOC108276422	197.84	541.191	2.7355	9.67765e-07	Up	ERBB receptor feedback inhibitor 1-like
eif4e3	820.62	2175.88	2.65151	1.90456e-16	Up	eukaryotic translation initiation factor 4E family member 3
eif6	927.133	1890.67	2.03927	5.20812e-09	Up	eukaryotic translation initiation factor 6
LOC108259331	28.3173	62.1283	2.19401	0.0116376	Up	excitatory amino acid transporter 2-like
exosc5	125.015	272.979	2.18356	2.42907e-06	Up	exosome component 5
xpot	848.73	2191.63	2.58224	1.0157e-15	Up	exportin for tRNA
fam134b	171.625	919.374	5.35688	1.39299e-36	Up	family with sequence similarity 134 member B
LOC100305117	414.544	937.922	2.26254	0.0019951	Up	fatty acid desaturase 2
LOC108275104	49.4872	176.096	3.55842	0.0036085	Up	fatty acid desaturase 2-like
fbxo30	212.398	1456.52	6.85748	8.23397e-52	Up	F-box protein 30
fbxo32	684.794	5531.19	8.07716	1.61112e-43	Up	F-box protein 32
LOC108261553	21.5711	47.0917	2.18309	0.0354748	Up	Fc receptor-like protein 5
LOC108262277	10.4659	47.9726	4.58369	2.75366e-05	Up	Fc receptor-like protein 5
LOC108268217	18.7594	47.4341	2.52855	0.00829818	Up	Fc receptor-like protein 5
fgf2	92.9198	260.857	2.80734	1.27248e-09	Up	fibroblast growth factor 2
filip1	372.873	1055.73	2.83134	1.57964e-16	Up	filamin A interacting protein 1
fosl1	74.3782	682.207	9.17213	6.87093e-16	Up	FOS like 1, AP-1 transcription factor subunit
fosb	166.79	1482.64	8.88928	2.99717e-33	Up	FosB proto-oncogene, AP-1 transcription factor subunit
LOC108260857	58.4577	132.614	2.26854	0.000199243	Up	fucolectin-like
LOC108275732	857.84	1916.88	2.23454	2.14099e-10	Up	FYVE and coiled-coil domain-containing protein 1-like
gpr84	146.802	398.205	2.71254	3.01229e-11	Up	G protein-coupled receptor 84
LOC108266696	1279.06	2956.66	2.31159	9.63681e-13	Up	gamma-aminobutyric acid receptor-associated protein-like 1
gins2	96.5257	221.503	2.29476	2.44524e-06	Up	GINS complex subunit 2
gpt2	511.078	1450.87	2.83883	3.44252e-10	Up	glutamic--pyruvic transaminase 2
LOC108280762	3652.02	7505.06	2.05505	3.01318e-10	Up	glutamine synthetase
LOC108272186	1203.73	3519.01	2.92343	1.25917e-20	Up	glutamine synthetase-like
LOC108263429	253.25	1384.36	5.46637	9.44307e-42	Up	glutathione-specific gamma-glutamylcyclotransferase 1-like
LOC108266598	294.507	701.087	2.38055	0.00854846	Up	glycerol kinase-like
gpcpd1	580.665	1475.76	2.5415	3.39031e-14	Up	glycerophosphocholine phosphodiesterase 1
LOC108268958	6.15872	21.3625	3.46867	0.0318796	Up	golgin subfamily A member 5-like
LOC108277131	519.882	1591.44	3.06116	3.0091e-20	Up	GRAM domain-containing protein 1B-like
gadd45b	554.044	1440.89	2.60068	4.80602e-15	Up	growth arrest and DNA damage inducible beta
LOC108280806	123.165	342.849	2.78366	4.70597e-11	Up	growth arrest and DNA damage-inducible protein GADD45 alpha-like
LOC108264575	0.78064	19.3698	24.8127	0.000141064	Up	growth arrest-specific protein 8-like
LOC108272504	74.6374	186.79	2.50263	0.000890366	Up	GTPase IMAP family member 7-like
LOC108272501	10.2448	42.236	4.12266	0.00021182	Up	GTPase IMAP family member 8-like
heatr3	127.198	295.92	2.32646	2.29171e-07	Up	HEAT repeat containing 3
LOC108259092	372.76	5257.49	14.1042	4.93791e-37	Up	heat shock 70 kDa protein 1
LOC108259095	45.4251	597.86	13.1614	1.26735e-21	Up	heat shock 70 kDa protein-like
LOC108262339	37.2492	471.7	12.6633	1.85464e-47	Up	heat shock 70 kDa protein-like
LOC108276142	171.867	639.13	3.71874	5.7407e-12	Up	heat shock protein 30-like
LOC108279221	603.057	2110.27	3.49929	2.95202e-26	Up	heat shock protein beta-11-like
hspb3	81.2548	223.361	2.7489	0.0316379	Up	heat shock protein family B (small) member 3
hspb7	980.486	2071.68	2.11291	2.95532e-07	Up	heat shock protein family B (small) member 7
hspb8	766.607	1963.23	2.56093	3.28877e-15	Up	heat shock protein family B (small) member 8
LOC108257813	772.931	2975.27	3.84933	6.9377e-31	Up	heat shock protein HSP 90-alpha 1
herc2	1661.08	6031.76	3.63123	5.97959e-09	Up	HECT and RLD domain containing E3 ubiquitin protein ligase 2
LOC108272926	9.58183	60.3646	6.2999	2.28646e-08	Up	heme oxygenase-like
LOC108266531	281.377	906.104	3.22024	3.11418e-13	Up	hemicentin-2-like
hamp	269.021	709.53	2.63745	0.00985029	Up	hepcidin antimicrobial peptide
LOC108277111	101.52	209.964	2.06819	0.0225128	Up	hephaestin-like protein 1
LOC108268302	516.304	1126.24	2.18135	7.39734e-10	Up	HIG1 domain family member 1A, mitochondrial-like
LOC108273089	40.3512	83.2035	2.06198	0.00708435	Up	high-affinity lysophosphatidic acid receptor-like
LOC108261486	1.42662	11.2153	7.86142	0.0321381	Up	histone H1-like
LOC108265336	28.1792	60.4455	2.14504	0.01531	Up	hyaluronan synthase 1-like
LOC108263948	3.66484	17.1544	4.68079	0.0215329	Up	hydrocephalus-inducing protein-like
LOC108279075	86.0972	207.227	2.4069	1.11927e-06	Up	hypoxia-inducible factor 1-alpha-like
LOC108265578	245.739	766.921	3.12088	5.97155e-15	Up	ictacalcin-like
LOC108261286	985.192	2892.38	2.93585	3.71878e-06	Up	immediate early response gene 2 protein-like
LOC108263359	253.148	620.816	2.45238	7.34144e-11	Up	interferon regulatory factor 2-like
il11	5.89274	35.3231	5.99434	4.36147e-05	Up	interleukin 11
LOC108255388	158.866	1043.42	6.56793	5.38533e-13	Up	jun dimerization protein 2-like
jam3	215.624	563.909	2.61524	1.19925e-05	Up	junctional adhesion molecule 3
klhl21	173.319	455.866	2.63022	0.000127643	Up	kelch like family member 21
klhl30	154.389	467.469	3.02787	5.52391e-10	Up	kelch like family member 30
klhl38	186.295	3747.41	20.1155	4.95791e-122	Up	kelch like family member 38
LOC108256314	421.555	854.709	2.02751	1.53887e-05	Up	kelch-like protein 24
LOC108268357	103.703	441.334	4.25576	5.28782e-22	Up	kell blood group glycoprotein-like
LOC108271642	61.1832	126.208	2.06278	0.0013474	Up	kinesin-like protein KIFC3
LOC108274922	262.136	574.461	2.19147	2.59266e-05	Up	Krueppel-like factor 13
LOC108280879	804.723	2028.96	2.52131	7.74488e-15	Up	Krueppel-like factor 2
klf4	391.149	1640.14	4.19313	2.93883e-14	Up	Kruppel like factor 4
klf9	975.285	3210.95	3.29232	8.87116e-25	Up	Kruppel like factor 9
lamb3	440.971	887.459	2.01251	7.64769e-08	Up	laminin subunit beta 3
LOC108267955	1046.56	3021.7	2.88727	1.17643e-09	Up	large neutral amino acids transporter small subunit 2-like
LOC108262782	163.526	391.705	2.39537	9.52825e-07	Up	large neutral amino acids transporter small subunit 3-like
lap3	178.027	412.351	2.31623	1.75436e-08	Up	leucine aminopeptidase 3
lrrc14b	26.1306	71.0314	2.71832	0.000489426	Up	leucine rich repeat containing 14B
lrit1	9.66827	26.8755	2.77977	0.0452004	Up	leucine rich repeat, Ig-like and transmembrane domains 1
LOC108278898	514.556	1196.32	2.32496	2.25753e-11	Up	leucine-rich repeat neuronal protein 4-like
LOC108271513	85.8148	196.79	2.2932	8.26649e-06	Up	leucine-rich repeat-containing protein 15-like
lipc	222.631	551.603	2.47766	0.00483903	Up	lipase C, hepatic type
lpin1	1044.98	3498.29	3.3477	1.21816e-09	Up	lipin 1
LOC108280930	455.113	1193.23	2.62184	0.000889477	Up	lipoprotein lipase-like
lyve1	483.519	1415.9	2.92832	1.07945e-18	Up	lymphatic vessel endothelial hyaluronan receptor 1
LOC108266564	865.344	1759.3	2.03306	4.40895e-06	Up	lysosome-associated membrane glycoprotein 1-like
LOC108260493	639.824	1405.34	2.19645	2.00844e-10	Up	mannosyl-oligosaccharide glucosidase-like
mknk2	61.6736	923.674	14.9768	1.84955e-76	Up	MAP kinase interacting serine/threonine kinase 2
LOC108271012	506.708	1041.41	2.05524	2.88603e-07	Up	maternal B9.15 protein-like
LOC108277439	46.3964	140.828	3.03532	1.30146e-07	Up	matrilysin-like
mmp9	2325.51	4780.41	2.05564	5.87903e-05	Up	matrix metalloproteinase 9
LOC108266051	4.36603	26.0655	5.97008	0.0112767	Up	matrix metalloproteinase-19-like
mlph	94.2801	235.268	2.49542	1.37215e-07	Up	melanophilin
metap2	3.98603	18.4448	4.62736	0.0179286	Up	methionyl aminopeptidase 2
LOC108258809	250.152	751.951	3.00598	0.00737533	Up	microfibril-associated glycoprotein 4-like
map1lc3a	780.237	1634.33	2.09466	1.86788e-09	Up	microtubule associated protein 1 light chain 3 alpha
midn	321.05	670.61	2.0888	8.20977e-07	Up	midnolin
LOC108271022	353.451	835.717	2.36445	5.06676e-11	Up	midnolin-like
LOC108276352	33.2944	70.1177	2.10599	0.0210964	Up	mitochondrial carnitine/acylcarnitine carrier protein-like
mrm3	28.8629	59.5363	2.06273	0.0237855	Up	mitochondrial rRNA methyltransferase 3
LOC108280869	34.8212	124.271	3.56884	1.6253e-08	Up	mitochondrial ubiquitin ligase activator of nfkb 1-A-like
LOC108277383	943.632	2825.74	2.99454	9.62149e-21	Up	mitochondrial uncoupling protein 2-like
LOC108259325	281.435	775.002	2.75375	1.52977e-14	Up	monocarboxylate transporter 7-like
LOC108273360	18.5004	57.5406	3.11023	0.0003839	Up	mothers against decapentaplegic homolog 4-like
LOC108267330	158.158	1431.22	9.04931	5.19046e-24	Up	multidrug resistance protein 1-like
mustn1	1153.5	3153.11	2.73352	0.0368814	Up	musculoskeletal, embryonic nuclear protein 1
myf6	58.1058	172.733	2.97274	0.000221978	Up	myogenic factor 6
miox	788.255	1619.3	2.05428	0.0239011	Up	myo-inositol oxygenase
LOC100304638	51.5913	166.461	3.22653	3.57889e-09	Up	myosin heavy chain, fast skeletal muscle
LOC108261602	27.8371	158.888	5.70777	3.72917e-10	Up	myosin heavy chain, fast skeletal muscle-like
LOC108261877	8.34174	74.4001	8.91902	1.02158e-05	Up	myosin heavy chain, fast skeletal muscle-like
LOC108261628	13.2364	47.4468	3.58458	0.000446222	Up	myosin-7-like
LOC108271488	716.219	4207.21	5.8742	3.80328e-10	Up	myosin-7-like
LOC108277382	48.137	103.067	2.14112	0.00178403	Up	nectin-4-like
ngrn	173.443	399.029	2.30064	2.88102e-08	Up	neugrin, neurite outgrowth associated
LOC108256632	168.89	773.845	4.58195	6.34424e-21	Up	neural cell adhesion molecule 1-like
npas4	26.5313	188.123	7.0906	1.763e-05	Up	neuronal PAS domain protein 4
nh2l1	284.14	718.534	2.5288	0.00675756	Up	nhp2-like protein 1
LOC108258972	166.966	463.684	2.77711	2.64281e-12	Up	nicotinamide N-methyltransferase-like
noct	278.387	646.557	2.32251	1.98993e-08	Up	nocturnin
LOC108279857	651.65	2846.96	4.36885	4.50766e-30	Up	nuclear factor erythroid 2-related factor 1-like
LOC108279453	716.654	1577.24	2.20084	1.57511e-10	Up	nuclear factor interleukin-3-regulated protein-like
LOC108255274	194.589	1511.89	7.76968	1.20811e-13	Up	nuclear receptor subfamily 4 group A member 1-like
LOC108276383	200.296	798.924	3.98872	1.80272e-17	Up	nuclear receptor subfamily 4 group A member 1-like
LOC108273759	85.9943	392.198	4.56075	2.59017e-22	Up	ORM1-like protein 3
oxnad1	74.9515	153.23	2.04439	0.000492711	Up	oxidoreductase NAD binding domain containing 1
pak1ip1	357.775	846.042	2.36473	4.39985e-11	Up	PAK1 interacting protein 1
palb2	73.3417	204.956	2.79453	1.62647e-08	Up	partner and localizer of BRCA2
pnpla2	183.657	706.903	3.84903	7.27564e-11	Up	patatin like phospholipase domain containing 2
LOC108271732	992.08	6228.28	6.278	3.36811e-57	Up	peptidyl-prolyl cis-trans isomerase FKBP5-like
LOC108265585	88.1345	180.853	2.05201	0.0250691	Up	periaxin-like
plin2	652.144	1922.35	2.94773	1.25127e-19	Up	perilipin 2
prph2	24.2345	51.6267	2.1303	0.0268936	Up	peripherin 2
LOC108270890	382.677	774.481	2.02385	1.35737e-07	Up	peroxisome proliferator-activated receptor gamma coactivator-related protein 1-like
LOC108254891	88.8927	258.257	2.90527	2.5336e-10	Up	phosphatase and actin regulator 3-like
LOC108256891	78.7611	164.798	2.09237	0.00128874	Up	phospholipase ABHD3-like
pmm1	1007.58	2208.15	2.19153	5.24467e-11	Up	phosphomannomutase 1
pid1	94.6372	214.323	2.26468	0.000380116	Up	phosphotyrosine interaction domain containing 1
pitrm1	449.756	1036.32	2.30418	5.9172e-11	Up	pitrilysin metallopeptidase 1
plek2	81.9463	293.469	3.58123	1.47508e-10	Up	pleckstrin 2
praf3	465.228	1264.28	2.71755	8.30267e-16	Up	pra1 family protein 3
LOC108257014	113.607	322.271	2.83672	1.57683e-06	Up	proline-rich protein 15-like
LOC108257974	387.783	1683.18	4.3405	1.59317e-30	Up	prostaglandin G/H synthase 2-like
LOC108277762	400.819	916.638	2.28691	0.00157143	Up	prostaglandin G/H synthase 2-like
LOC108277763	65.4806	172.911	2.64064	6.84863e-07	Up	prostaglandin G/H synthase 2-like
psmc3	869.472	1854.69	2.13312	2.9211e-10	Up	proteasome 26S subunit, ATPase 3
psmd11	1647.88	3359.46	2.03865	1.55781e-09	Up	proteasome 26S subunit, non-ATPase 11
psmd12	1267.97	2800.91	2.20898	1.63877e-11	Up	proteasome 26S subunit, non-ATPase 12
psmd14	728.071	2068.83	2.84153	1.47592e-18	Up	proteasome 26S subunit, non-ATPase 14
psmd3	1326.3	3121.44	2.3535	1.84915e-13	Up	proteasome 26S subunit, non-ATPase 3
psmd7	1064.5	2440.92	2.29303	8.72166e-10	Up	proteasome 26S subunit, non-ATPase 7
psmd8	2177.35	5352.04	2.45805	8.86272e-05	Up	proteasome 26S subunit, non-ATPase 8
psme3	359.585	842.961	2.34426	0.00315929	Up	proteasome activator subunit 3
LOC100304914	1060.8	2861.79	2.69778	3.4092e-07	Up	proteasome subunit alpha type-7
psmb7	1081.21	2698.61	2.4959	3.10021e-15	Up	proteasome subunit beta 7
LOC108280801	215.389	665.582	3.09013	9.51254e-17	Up	protein ABHD4-like
LOC108256288	434.69	1224.04	2.8159	9.62e-17	Up	protein asteroid homolog 1-like
LOC108255010	1088.34	4647.75	4.27051	1.35707e-31	Up	protein BTG2-like
pkmyt1	70.6889	154.506	2.18571	9.96137e-05	Up	protein kinase, membrane associated tyrosine/threonine 1
LOC108267993	240.687	1070.24	4.44662	0.000221524	Up	protein phosphatase 1 regulatory subunit 15B-like
LOC108262159	66.641	240.755	3.61272	1.56765e-13	Up	protein phosphatase 1 regulatory subunit 3C-B-like
LOC108276522	53.6322	163.429	3.04723	2.07874e-08	Up	protein phosphatase 1 regulatory subunit 3C-B-like
LOC108276554	112.067	444.9	3.96996	1.60597e-12	Up	protein phosphatase 1 regulatory subunit 3C-B-like
LOC108277626	20.7938	66.8886	3.21675	7.25025e-05	Up	protein phosphatase 1A-like
LOC108267660	133.251	366.806	2.75276	3.55208e-11	Up	protein phosphatase 1L-like
LOC108277939	391.945	1125.31	2.8711	6.58632e-08	Up	protein phosphatase Slingshot homolog 2-like
LOC108268910	9.76114	31.0368	3.17963	0.0114222	Up	protein RD3-like
LOC108255502	101.192	263.46	2.60356	1.43288e-08	Up	protein transport protein Sec24C-like
LOC108260991	1039.35	3596.84	3.46065	6.85893e-08	Up	proto-oncogene c-Fos-like
pwp1	180.443	379.501	2.10316	1.27184e-06	Up	PWP1 homolog, endonuclein
LOC108274275	811.993	10098.2	12.4363	9.27033e-18	Up	pyruvate dehydrogenase (acetyl-transferring) kinase isozyme 2, mitochondrial-like
rab1a	422.59	1049.12	2.4826	7.67099e-13	Up	RAB1A, member RAS oncogene family
LOC108266861	153.561	456.895	2.97533	6.94288e-14	Up	ras-related protein Rab-33B-like
rsf1	76.0532	157.163	2.06649	0.000460648	Up	remodeling and spacing factor 1
LOC108260147	23.9925	49.504	2.06331	0.0427081	Up	rhodopsin kinase-like
LOC108280996	59.3629	123.447	2.07953	0.00091281	Up	rhodopsin, freshwater form-like
rnd3	68.9001	142.327	2.0657	0.000703042	Up	rho-related gtp-binding protein rhoe
rfesd	27.8919	72.4736	2.59838	0.000785047	Up	Rieske Fe-S domain containing
rbm24	555.539	1304.44	2.34807	6.81006e-12	Up	RNA binding motif protein 24
LOC108263593	92.167	209.936	2.27778	7.19485e-06	Up	RNA binding protein fox-1 homolog 1-like
LOC108266559	194.129	717.341	3.69517	3.11188e-22	Up	serine/threonine-protein kinase SIK2-like
LOC108265551	282.82	769.309	2.72013	1.57511e-10	Up	serine/threonine-protein kinase ULK1-like
LOC108257086	514.767	1260.98	2.44961	1.51362e-05	Up	serine/threonine-protein kinase WNK4-like
LOC108257103	7.2848	26.9004	3.69268	0.00877239	Up	serotonin N-acetyltransferase-like
serpine1	348.187	750.82	2.15637	0.0101123	Up	serpin family E member 1
LOC108275998	530.303	1264.15	2.38383	4.62556e-08	Up	sesquipedalian-1-like
sesn1	5720.33	14371.9	2.51243	2.43059e-16	Up	sestrin 1
setd4	74.5194	152.333	2.04421	0.000519253	Up	SET domain containing 4
LOC108268509	16.2034	39.147	2.41597	0.0297186	Up	shaker-related potassium channel tsha2-like
sirt4	126.874	259.993	2.04922	2.89024e-05	Up	sirtuin 4
snai3	11.6715	40.7873	3.49462	0.00122068	Up	snail family transcriptional repressor 3
LOC108270036	907.345	2076.79	2.28886	0.00192035	Up	sodium-dependent neutral amino acid transporter B(0)AT1-like
LOC108270030	604.631	1729.27	2.86005	0.000526852	Up	sodium-dependent neutral amino acid transporter B(0)AT3-like
LOC108274433	174.698	499.597	2.85978	0.00726258	Up	solute carrier family 13 member 1-like
slc19a2	133.071	284.9	2.14096	7.67412e-06	Up	solute carrier family 19 member 2
slc2a12	152.428	442.527	2.9032	4.68834e-13	Up	solute carrier family 2 member 12
LOC108276488	145.426	309.364	2.1273	3.36938e-06	Up	solute carrier family 2, facilitated glucose transporter member 1-like
LOC108270407	27.8993	59.7291	2.14088	0.0154176	Up	solute carrier family 22 member 7-like
slc25a17	23.5818	54.8579	2.32628	0.0127327	Up	solute carrier family 25 member 17
slc25a35	34.7832	81.4522	2.34171	0.00156957	Up	solute carrier family 25 member 35
slc25a43	349.689	822.996	2.35351	0.00207889	Up	solute carrier family 25 member 43
slc26a6	382.649	1495.01	3.907	4.61481e-07	Up	solute carrier family 26 member 6
LOC108271864	2.23822	36.8968	16.4849	1.3992e-08	Up	solute carrier family 26 member 6-like
slc35e4	121.894	365.439	2.99801	1.6367e-12	Up	solute carrier family 35 member E4
slc43a2	962.885	2888.12	2.99944	4.67192e-21	Up	solute carrier family 43 member 2
LOC108269099	52.3443	110.011	2.10168	0.00162641	Up	solute carrier family 43 member 3-like
slc47a1	27.8026	100.49	3.61441	1.81931e-07	Up	solute carrier family 47 member 1
LOC108274458	233.537	475.065	2.03422	1.27114e-06	Up	stanniocalcin-2-like
stard5	27.2911	56.7344	2.07887	0.0303186	Up	StAR related lipid transfer domain containing 5
steap4	2022.77	6705.21	3.31486	2.42536e-17	Up	STEAP4 metalloreductase
scd	1843.34	8766.11	4.75556	2.51714e-43	Up	stearoyl-CoA desaturase
syt10	46.7176	107.484	2.30072	0.0169543	Up	synaptotagmin 10
stxbp4	110.274	464.741	4.21443	0.00135795	Up	syntaxin binding protein 4
tectb	24.4378	55.0161	2.25127	0.0121027	Up	tectorin beta
LOC108261065	1143.44	2643.03	2.31147	9.08625e-13	Up	telethonin-like
txndc9	862.122	2090.41	2.42473	9.21465e-14	Up	thioredoxin domain containing 9
LOC108257532	71.6561	413.228	5.76682	1.90597e-10	Up	thyroxine 5-deiodinase-like
tnfrsf21	226.522	587.264	2.59253	7.70309e-12	Up	TNF receptor superfamily member 21
tlr-5	108.022	834.948	7.72944	9.79936e-49	Up	toll-like receptor 5
LOC108272820	1857.07	4848.67	2.61092	2.73455e-06	Up	traf2 and NCK-interacting protein kinase-like
LOC108260159	181.529	390.81	2.15287	3.67308e-07	Up	transcription factor IIIA-like
LOC108260366	81.31	165.446	2.03476	0.000420946	Up	transmembrane protein 127-like
tmem41a	95.0512	214.975	2.26168	7.58402e-06	Up	transmembrane protein 41A
tmem41b	128.954	383.991	2.97774	5.31416e-13	Up	transmembrane protein 41B
LOC108254833	470.567	1091.15	2.31881	2.69234e-11	Up	tribbles homolog 2-like
trim55	241.421	2677.22	11.0894	4.79887e-83	Up	tripartite motif containing 55
LOC108264749	12.8081	141.411	11.0407	6.27786e-06	Up	tripartite motif-containing protein 35-like
LOC108276180	200.864	1214.7	6.04739	3.01304e-44	Up	tripartite motif-containing protein 54-like
tpp2	279.626	676.374	2.41885	7.34144e-11	Up	tripeptidyl peptidase 2
tsnare1	44.6445	95.6653	2.14282	0.00235478	Up	t-SNARE domain containing 1
tpcn2	400.369	1576.15	3.93675	7.85847e-19	Up	two pore segment channel 2
LOC108276081	99.1997	233.468	2.35351	0.00156604	Up	U8 snoRNA-decapping enzyme-like
LOC101154659	321.452	687.527	2.13881	3.40203e-08	Up	ubiquitin carboxyl-terminal hydrolase 12
usp13	960.51	3842.58	4.00056	1.91146e-17	Up	ubiquitin specific peptidase 13 (isopeptidase T-3)
usp38	144.846	308.996	2.13327	2.79125e-06	Up	ubiquitin specific peptidase 38
LOC108265473	613.132	1455.54	2.37394	2.57299e-12	Up	ubiquitin-conjugating enzyme E2 D4
ulk2	553.241	1662.23	3.00453	3.83578e-10	Up	unc-51 like autophagy activating kinase 2
LOC100304688	25.747	56.9021	2.21004	0.0318796	Up	uncharacterized LOC100304688
LOC108254926	38.3338	85.9376	2.24182	0.00189873	Up	uncharacterized LOC108254926
LOC108259524	17.0808	40.2106	2.35414	0.0367405	Up	uncharacterized LOC108259524
LOC108259772	638.126	1301.63	2.03977	0.000153563	Up	uncharacterized LOC108259772
LOC108260596	39.163	93.0083	2.37491	0.000713822	Up	uncharacterized LOC108260596
LOC108260940	139.979	310.389	2.2174	8.17128e-07	Up	uncharacterized LOC108260940
LOC108261387	14.276	36.1706	2.53366	0.0303186	Up	uncharacterized LOC108261387
LOC108270429	33.4769	67.5573	2.01803	0.0198125	Up	uncharacterized LOC108270429
LOC108271613	199.535	957.278	4.79755	1.81385e-08	Up	uncharacterized LOC108271613
LOC108273614	91.0438	582.913	6.40256	1.64963e-36	Up	uncharacterized LOC108273614
LOC108275515	696.353	1726.91	2.47993	3.79135e-07	Up	uncharacterized LOC108275515
LOC108275647	0.690868	13.9025	20.1233	0.00139908	Up	uncharacterized LOC108275647
LOC108275671	5.5958	103.528	18.501	9.69449e-05	Up	uncharacterized LOC108275671
LOC108278321	87.3935	209.384	2.39587	0.00166511	Up	uncharacterized LOC108278321
LOC108278470	70.8412	146.298	2.06516	0.000509734	Up	uncharacterized LOC108278470
LOC108279694	24.9736	75.3985	3.01912	7.50292e-05	Up	uncharacterized LOC108279694
LOC108279818	59.3799	353.676	5.95616	9.05021e-28	Up	uncharacterized LOC108279818
LOC108273413	506.512	1069.34	2.11118	6.53314e-09	Up	uncharacterized protein C10orf71-like
LOC108274290	16.1309	36.5544	2.26611	0.0494006	Up	Usher syndrome type-1G protein homolog
LOC108271249	546.445	1261.34	2.30827	1.05653e-05	Up	UV excision repair protein RAD23 homolog A-like
vezt	146.207	324.186	2.21731	6.11341e-07	Up	vezatin, adherens junctions transmembrane protein
LOC108256048	63.4911	188.402	2.96738	1.94533e-05	Up	volume-regulated anion channel subunit LRRC8A
LOC108272816	16.7596	52.2218	3.11593	0.00091281	Up	volume-regulated anion channel subunit LRRC8D-like
wdr74	191.957	385.308	2.00726	5.95117e-06	Up	WD repeat domain 74
wdr82	1766.17	7216.41	4.08591	1.16264e-20	Up	WD repeat domain 82
LOC108259041	177.499	423.376	2.38524	5.7848e-09	Up	WW domain binding protein 1-like
LOC108256337	325.61	1078.63	3.31264	3.91759e-21	Up	xin actin-binding repeat-containing protein 1-like
LOC108271159	70.5927	168.396	2.38545	8.7818e-05	Up	Y+L amino acid transporter 2
zfand2a	218.212	495.66	2.27146	2.62095e-08	Up	zinc finger AN1-type containing 2A
zbtb16	65.1798	141.799	2.17551	0.000545926	Up	zinc finger and BTB domain containing 16
zbtb21	26.1547	53.9439	2.0625	0.0377604	Up	zinc finger and BTB domain containing 21
LOC108278332	65.0831	202.106	3.10535	9.73614e-10	Up	zinc finger and BTB domain-containing protein 16-A-like
LOC108258215	107.773	231.664	2.14956	1.64656e-05	Up	zinc finger protein 32-like
LOC108256717	72.2536	190.711	2.63947	2.36023e-07	Up	zinc finger protein 804B-like
LOC108273717	152.117	466.969	3.06979	1.93322e-14	Up	zinc-binding protein A33-like
LOC108257519	396.023	192.349	0.485701	2.02062e-06	Down	14 kDa phosphohistidine phosphatase-like
LOC108276501	36.9002	14.7245	0.399037	0.0250211	Down	1-acylglycerol-3-phosphate O-acyltransferase ABHD5-like
LOC108256182	1449.85	622.79	0.429555	5.65356e-05	Down	1-phosphatidylinositol phosphodiesterase-like
hmgcr	1045.7	158.881	0.151937	1.41889e-17	Down	3-hydroxy-3-methylglutaryl-CoA reductase
LOC108260398	15092	5477.59	0.362947	5.20462e-11	Down	4-hydroxyphenylpyruvate dioxygenase
LOC108260967	561.908	273.03	0.485898	0.0337406	Down	5,6-dihydroxyindole-2-carboxylic acid oxidase-like
LOC108258316	55.2464	7.86382	0.142341	0.00026564	Down	5-hydroxytryptamine receptor 3A-like
LOC108278612	238.277	118.528	0.497437	6.7578e-05	Down	A disintegrin and metalloproteinase with thrombospondin motifs 2-like
LOC108267171	215.578	62.3983	0.289447	0.000641557	Down	acetylcholine receptor subunit beta-like
LOC108260097	396.927	181.862	0.458175	2.52467e-07	Down	acetylcholine receptor subunit gamma-like
LOC108274588	36.1028	12.9279	0.358085	0.0135365	Down	achaete-scute homolog 1b-like
act2	315110	125830	0.399322	0.000769697	Down	actin alpha sarcomeric/cardiac
actrt3	5217.39	2317.17	0.444124	0.0158169	Down	actin related protein T3
acta1	350658	157500	0.449155	0.00072979	Down	actin, alpha 1, skeletal muscle
acta2	24353.3	8234.54	0.338128	2.19822e-22	Down	actin, alpha 2, smooth muscle, aorta
LOC108258095	37802.6	7952.48	0.210369	4.86976e-07	Down	actin, alpha cardiac
LOC108257679	3069.14	1448.13	0.471835	0.00394061	Down	actin, alpha cardiac muscle 1
LOC108269395	10408.3	3770.18	0.362227	0.00487885	Down	actin, alpha cardiac muscle 1-like
acsbg1	14.2239	1.19769	0.0842027	0.0375743	Down	acyl-CoA synthetase bubblegum family member 1
adamts12	97.3172	32.3149	0.332058	5.94508e-06	Down	ADAM metallopeptidase with thrombospondin type 1 motif 12
adamts18	77.9147	38.0256	0.488041	0.00876245	Down	ADAM metallopeptidase with thrombospondin type 1 motif 18
LOC108278204	1917.15	894.146	0.466395	2.40777e-06	Down	adenine phosphoribosyltransferase-like
adad1	40.4379	0	0	2.09801e-15	Down	adenosine deaminase domain containing 1
LOC108267669	27.0251	8.44875	0.312626	0.0164449	Down	adenosine deaminase domain-containing protein 2-like
ampd1	10421.2	5035.59	0.483206	1.92677e-10	Down	adenosine monophosphate deaminase 1
LOC108258741	120.274	52.9507	0.440251	0.0205767	Down	adhesion G protein-coupled receptor E3-like
LOC108267718	474.686	198.924	0.419064	1.99949e-08	Down	adiponectin-like
aebp1	1196.36	595.233	0.497538	6.65118e-06	Down	AE binding protein 1
LOC108258440	80.158	0	0	3.37332e-07	Down	afadin- and alpha-actinin-binding protein B-like
agmat	253.472	95.1803	0.375506	1.33571e-06	Down	agmatinase
LOC108276909	11.7303	1.52547	0.130045	0.0219184	Down	A-kinase anchor protein 1, mitochondrial-like
LOC108263479	26749.9	6498.7	0.242943	1.00228e-23	Down	alcohol dehydrogenase 1-like
LOC108268712	278.829	72.358	0.259507	0.00166423	Down	alcohol dehydrogenase class-3-like
LOC108277610	1350.97	665.291	0.492455	0.0143701	Down	alkaline phosphatase, tissue-nonspecific isozyme-like
LOC108272278	641.786	264.822	0.412632	0.00136812	Down	allantoinase, mitochondrial-like
ambp	21479.2	10414.7	0.484874	0.0199622	Down	alpha-1-microglobulin/bikunin precursor
LOC108267477	17866.8	5030.4	0.281551	0.00632535	Down	alpha-2-HS-glycoprotein-like
LOC108271434	1108.32	452.096	0.407912	0.00669171	Down	alpha-2-HS-glycoprotein-like
LOC108277478	897.264	429.257	0.478407	8.41857e-06	Down	alpha-2-macroglobulin-like
LOC108265831	438.13	190.537	0.434886	0.000167271	Down	alpha-2-macroglobulin-like protein 1
LOC108270464	1827.64	754.027	0.412567	0.00187344	Down	alpha-actinin-2
amdhd1	285.734	129.243	0.452321	0.000247921	Down	amidohydrolase domain containing 1
LOC108267487	3309.22	596.853	0.18036	5.177e-48	Down	angiopoietin-related protein 3-like
asb15	90.7022	11.2425	0.12395	2.96006e-14	Down	ankyrin repeat and SOCS box containing 15
LOC108261128	195.619	31.8405	0.162768	1.21273e-20	Down	ankyrin repeat and SOCS box protein 18-like
ankrd29	35.3459	11.7382	0.332096	0.00833642	Down	ankyrin repeat domain 29
LOC108268512	279.702	121.653	0.434938	4.16428e-07	Down	anoctamin-1-like
LOC108273355	583.38	284.914	0.488385	3.95565e-07	Down	anterior gradient protein 2 homolog
LOC108276849	499.977	172.178	0.344372	4.83881e-14	Down	anthrax toxin receptor 1-like
LOC108276875	312.652	151.938	0.485965	8.71152e-06	Down	anthrax toxin receptor 2-like
LOC108258487	419.195	175.766	0.419293	3.36294e-09	Down	antigen peptide transporter 2-like
LOC108271429	26806.4	10863.3	0.405251	0.00247402	Down	antihemorrhagic factor cHLP-B-like
apoa2	5881.95	2560.81	0.435367	0.0134421	Down	apolipoprotein A2
LOC108257096	87.6222	21.0368	0.240085	0.0126289	Down	apolipoprotein A-I-like
LOC108276380	53.432	18.4468	0.345239	0.00105111	Down	apolipoprotein L3-like
apom	2124.68	497.714	0.234254	9.32786e-19	Down	apolipoprotein M
LOC108265981	2220.98	1030.56	0.464013	2.97859e-09	Down	aquaporin-10-like
LOC108271384	408.416	125.763	0.307929	0.00769589	Down	aquaporin-12-like
LOC108267089	722.238	2.73063	0.00378079	6.28771e-15	Down	aquaporin-1-like
LOC108254852	249.446	4.54138	0.0182059	4.21599e-16	Down	arginine-glutamic acid dipeptide repeats protein-like
aadacl4	701.793	295.308	0.420791	0.0323969	Down	arylacetamide deacetylase like 4
LOC108275700	985.694	368.324	0.373669	1.09598e-14	Down	asialoglycoprotein receptor 1-like
aspdh	121.129	50.5933	0.41768	0.000589342	Down	aspartate dehydrogenase domain containing
aspn	1819.06	600.835	0.330299	3.29968e-15	Down	asporin
LOC108271743	229.784	52.848	0.22999	4.30835e-15	Down	ATP-dependent 6-phosphofructokinase, muscle type-like
LOC108277130	300.873	1.20516	0.00400556	3.23751e-81	Down	avidin-like
LOC108275580	242.148	0.606171	0.00250331	2.42323e-13	Down	baculoviral IAP repeat-containing protein 5.1-like
LOC108270073	46.3136	1.79756	0.0388128	4.01077e-10	Down	barrier-to-autointegration factor-like protein
LOC108258423	3578.55	1504.24	0.420349	0.000557111	Down	basement membrane-specific heparan sulfate proteoglycan core protein-like
batf2	214.938	91.9799	0.427936	2.79125e-06	Down	basic leucine zipper ATF-like transcription factor 2
LOC108277734	160.334	78.3197	0.488478	0.000326768	Down	B-cell receptor CD22-like
bco2	220.646	108.46	0.491556	7.03322e-05	Down	beta-carotene oxygenase 2
LOC108275697	4320.2	1939.79	0.449006	4.6001e-10	Down	beta-enolase-like
LOC108276513	2602.03	815.233	0.313307	3.25325e-23	Down	beta-galactoside-binding lectin-like
LOC108279028	5113.2	2483.67	0.485736	0.0261378	Down	betaine--homocysteine S-methyltransferase 1
LOC108276536	58.2464	9.95531	0.170917	9.37114e-06	Down	beta-microseminoprotein-like
LOC108276332	177.47	38.9871	0.219682	7.47301e-15	Down	bifunctional apoptosis regulator-like
LOC108265721	789.135	317.367	0.40217	1.3908e-06	Down	biglycan-like
LOC108261330	424.34	179.597	0.423239	5.128e-09	Down	BOLA class I histocompatibility antigen, alpha chain BL3-7-like
LOC108259614	122.834	1.52576	0.0124213	1.2155e-22	Down	borealin-2-like
btg4	86.9307	1.51111	0.0173829	3.455e-06	Down	BTG anti-proliferation factor 4
LOC108281085	308.502	97.871	0.317246	6.51659e-10	Down	C->U-editing enzyme APOBEC-2-like
cdh15	91.5935	38.2555	0.417666	0.00113761	Down	cadherin 15
LOC108278958	139.682	63.0955	0.451707	0.000164926	Down	calpain-1 catalytic subunit-like
LOC108257553	234.719	90.753	0.386645	4.31837e-08	Down	calpain-3-like
cnn1	793.651	267.302	0.336801	1.02233e-16	Down	calponin 1
LOC108264801	2823.5	1197.35	0.424068	9.23249e-06	Down	carboxylesterase 5A-like
LOC108272389	126.953	51.7864	0.407919	3.35011e-05	Down	carboxylesterase notum2-like
cpb2	1609.46	643.225	0.399653	6.56699e-14	Down	carboxypeptidase B2
cpxm2	358.14	119.853	0.334655	1.82047e-06	Down	carboxypeptidase X (M14 family), member 2
cpz	581.535	282.763	0.486237	2.80518e-07	Down	carboxypeptidase Z
LOC108278534	386.773	139.664	0.361102	9.49538e-10	Down	cardiomyopathy-associated protein 5-like
LOC108274827	164.614	39.9043	0.242412	8.85147e-13	Down	cathepsin L1-like
cav3	835.943	346.977	0.415073	1.42085e-11	Down	caveolin 3
LOC108275955	60.0401	23.2718	0.387604	0.00218546	Down	caveolin-2-like
LOC108281023	82.2431	31.405	0.381856	0.000226597	Down	caveolin-2-like
LOC108270505	62.6165	19.3566	0.30913	0.000104546	Down	C-C chemokine receptor type 5-like
LOC108269114	12.6562	1.83917	0.145318	0.0193677	Down	C-C motif chemokine 14-like
LOC108255518	2486.51	591.438	0.237859	2.14804e-07	Down	C-C motif chemokine 19-like
LOC108268114	171.902	75.7782	0.440823	1.85211e-05	Down	C-C motif chemokine 3-like
LOC108256319	328.239	138.085	0.420684	3.04934e-08	Down	C-C motif chemokine 4-like
LOC108268439	492.21	160.932	0.326958	3.867e-15	Down	C-C motif chemokine 5-like
ccl28	102.634	33.0172	0.3217	5.98704e-05	Down	C-C motif chemokine ligand 28
LOC108260735	80.2022	38.3123	0.477697	0.00651376	Down	CD209 antigen-like protein E
LOC108259538	48.1991	22.915	0.475423	0.0409635	Down	CD276 antigen homolog
LOC108280687	2069.44	972.95	0.470151	3.44252e-10	Down	CD59 glycoprotein-like
cd84	125.05	57.1922	0.457353	0.000327797	Down	CD84 molecule
cenpv	370.681	173.842	0.46898	7.71992e-07	Down	centromere protein V
cdnf	118.698	39.1039	0.329441	5.8253e-07	Down	cerebral dopamine neurotrophic factor
LOC108275469	62.8826	28.9638	0.460601	0.0100832	Down	chemokine XC receptor 1-like
LOC108275521	37.2978	15.4364	0.413868	0.02971	Down	chemokine XC receptor 1-like
ctbs	569.775	217.143	0.381103	6.33317e-11	Down	chitobiase
LOC108278029	1780.09	762.215	0.42819	0.00636776	Down	cholesterol 7-alpha-monooxygenase-like
chad	70.1227	33.8829	0.483194	0.0118021	Down	chondroadherin
LOC108258844	41.671	3.94986	0.0947868	0.000389419	Down	chromatin target of PRMT1 protein-like
c1h8orf37	195.248	94.9184	0.486142	0.000113951	Down	chromosome 1 open reading frame, human C8orf37
c1h9orf152	120.742	50.2752	0.416385	0.000765599	Down	chromosome 1 open reading frame, human C9orf152
c12h17orf67	78.1326	19.6359	0.251315	5.08436e-06	Down	chromosome 12 open reading frame, human C17orf67
c20h2orf82	61.7425	27.2222	0.440899	0.0233716	Down	chromosome 20 open reading frame, human C2orf82
c6h2orf40	334.12	147.896	0.442642	0.000407444	Down	chromosome 6 open reading frame, human C2orf40
c9h14orf1	56.6343	27.2075	0.480408	0.0272559	Down	chromosome 9 open reading frame, human C14orf1
LOC108269388	303.264	51.4689	0.169717	1.17057e-07	Down	cis-aconitate decarboxylase-like
ciita	287.105	133.357	0.46449	3.03559e-06	Down	class II, major histocompatibility complex, transactivator
LOC108273231	43.2601	19.9298	0.460697	0.0418132	Down	claudin-10-like
LOC108278486	9.82717	0.306529	0.031192	0.00431682	Down	claudin-like protein ZF-A89
LOC108258891	32.2068	0	0	0.000106234	Down	claudin-like protein ZF-A9
LOC108272374	5934.43	2939.82	0.495383	1.95772e-09	Down	clumping factor A-like
f2	9123.37	4408.76	0.483238	0.0404762	Down	coagulation factor II, thrombin
LOC108263697	8.49703	0	0	0.00349132	Down	coiled-coil domain-containing protein 172-like
LOC108254901	313.955	155.004	0.493714	1.22035e-05	Down	coiled-coil domain-containing protein 3-like
LOC108278473	204.727	94.5993	0.462075	2.0449e-05	Down	coiled-coil domain-containing protein 80-like
LOC108273947	37761.4	11341.8	0.300354	1.24756e-24	Down	collagen alpha-1(I) chain-like
LOC108279263	54184.8	15166.2	0.279898	1.38647e-30	Down	collagen alpha-1(I) chain-like
LOC108265655	2679.9	565.875	0.211156	4.20462e-19	Down	collagen alpha-1(II) chain-like
LOC108260768	63.0652	29.6862	0.470722	0.0386592	Down	collagen alpha-1(IX) chain-like
LOC108270765	783.512	218.777	0.279227	2.2415e-15	Down	collagen alpha-1(IX) chain-like
LOC108270375	8086.87	3244.37	0.40119	5.91445e-16	Down	collagen alpha-1(X) chain-like
LOC108272765	1573.79	775.268	0.492612	1.23837e-08	Down	collagen alpha-1(XI) chain-like
LOC108280296	146.869	50.9426	0.346857	1.27113e-05	Down	collagen alpha-1(XI) chain-like
LOC108280306	1608.48	581.105	0.361276	4.51892e-17	Down	collagen alpha-1(XI) chain-like
LOC108270031	5237.33	2572.59	0.491203	9.41862e-10	Down	collagen alpha-1(XII) chain-like
LOC108263596	963.696	356.259	0.36968	4.15867e-15	Down	collagen alpha-1(XXI) chain-like
LOC108275156	73.384	25.9527	0.353656	0.00197302	Down	collagen alpha-1(XXI) chain-like
LOC108255759	70.8029	31.4502	0.444193	0.00688891	Down	collagen alpha-2(I) chain-like
LOC108263687	1368.14	508.888	0.371957	7.86362e-16	Down	collagen alpha-6(VI) chain-like
LOC108270904	1264.83	526.005	0.415869	1.88489e-12	Down	collagen alpha-6(VI) chain-like
LOC108257304	138.873	53.0776	0.382202	4.76515e-06	Down	collagen triple helix repeat-containing protein 1-like
col1a2	46542.9	13190.6	0.283406	2.13998e-21	Down	collagen type I alpha 2 chain
col9a2	587.761	137.418	0.233799	4.69443e-12	Down	collagen type IX alpha 2
col9a3	452.105	119.718	0.264802	2.24028e-14	Down	collagen type IX alpha 3
col5a1	5379.2	2372.53	0.441056	9.05744e-13	Down	collagen type V alpha 1
col6a1	5032.55	1549.79	0.307952	6.41334e-25	Down	collagen type VI alpha 1
col6a2	6932.23	3100.58	0.44727	1.82767e-12	Down	collagen type VI alpha 2
col11a1	2890.22	1042.48	0.360692	2.46297e-18	Down	collagen type XI alpha 1 chain
col22a1	681.358	324.108	0.47568	4.94625e-08	Down	collagen type XXII alpha 1
col25a1	53.3113	23.8917	0.448155	0.014958	Down	collagen type XXV alpha 1
colec11	121.282	44.663	0.368259	5.63492e-06	Down	collectin subfamily member 11
LOC108269102	76.1297	37.9163	0.498048	0.0344946	Down	collectin-10-like
LOC108273016	131.206	47.7854	0.364203	3.5592e-05	Down	complement C1q tumor necrosis factor-related protein 6-like
LOC108263468	7563.78	3441.38	0.454981	0.0346811	Down	complement C1r subcomponent-like
LOC108268478	496.703	242.298	0.487811	0.0218366	Down	complement C1r-B subcomponent-like
cfhr1	1074.14	412.614	0.384133	1.76211e-07	Down	complement factor H related 1
LOC108262173	48.3023	17.7953	0.368414	0.0044307	Down	condensin-2 complex subunit H2-like
LOC108260741	389.909	120.327	0.308603	5.12703e-15	Down	C-type lectin domain family 4 member E-like
clc4f	876.378	426.307	0.486441	3.19427e-05	Down	c-type lectin domain family 4 member f
LOC108260740	200.518	71.928	0.358712	0.00487885	Down	C-type lectin domain family 4 member M-like
LOC108271994	25.1529	2.11728	0.0841764	0.000741742	Down	cullin-2-like
LOC108261914	32.9147	8.78254	0.266827	0.00208942	Down	C-X-C motif chemokine 10-like
LOC108255700	28.162	2.43099	0.0863216	3.50886e-06	Down	C-X-C motif chemokine 11-like
LOC108255702	70.8791	32.9257	0.464533	0.00733378	Down	C-X-C motif chemokine 11-like
LOC108255701	219.221	78.8498	0.359682	7.41087e-07	Down	C-X-C motif chemokine 9-like
ccna1	144.284	0.29935	0.00207474	1.88114e-08	Down	cyclin A1
ccng1	3657.15	1577.05	0.431224	2.37248e-09	Down	cyclin G1
LOC108274791	11.2466	0.306529	0.0272553	0.0014186	Down	cyclin-dependent kinase 6-like
LOC108257254	209.97	89.9038	0.428175	0.00325788	Down	cystatin-B-like
LOC108279590	71.8816	19.0297	0.264737	0.000772901	Down	cystine/glutamate transporter-like
LOC108275904	1299.85	534.639	0.411307	4.25701e-08	Down	cytochrome c oxidase subunit 4 isoform 2, mitochondrial-like
LOC108280912	724.053	232.562	0.321194	6.02617e-05	Down	cytochrome c oxidase subunit 6A, mitochondrial
LOC108269083	587.581	214.305	0.364725	3.21214e-13	Down	cytochrome P450 2D15-like
LOC108269082	728.648	201.288	0.276249	3.57352e-08	Down	cytochrome P450 2D3-like
LOC108262053	50.3577	24.0817	0.478214	0.035374	Down	cytochrome P450 2F2-like
LOC108280590	527.965	199.831	0.378494	7.62135e-05	Down	cytochrome P450 2G1-like
LOC108280591	478.457	103.407	0.216127	2.19481e-23	Down	cytochrome P450 2G1-like
LOC108257767	337.757	156.668	0.463848	0.000640486	Down	cytochrome P450 2J2-like
LOC108269274	691.846	195.498	0.282575	9.62149e-21	Down	cytochrome P450 4V2
LOC108273252	73.0722	35.7117	0.488718	0.0124895	Down	cytohesin-interacting protein-like
cpeb1	36.3548	2.41721	0.0664895	0.00176446	Down	cytoplasmic polyadenylation element binding protein 1
st1s3	1079.06	440.66	0.408375	0.000283375	Down	cytosolic sulfotransferase 3
dao	547.617	219.846	0.40146	5.68469e-11	Down	D-amino acid oxidase
ddx4	105.024	36.4364	0.346935	4.624e-05	Down	DEAD-box helicase 4
ddx43	56.61	26.5603	0.469181	0.0222043	Down	DEAD-box helicase 43
dhrs7c	2008.14	903.483	0.44991	3.79715e-11	Down	dehydrogenase/reductase 7C
dio2	25.7197	6.9227	0.26916	0.00905036	Down	deiodinase, iodothyronine, type II
LOC108280023	11.4955	1.81133	0.157569	0.0351566	Down	deleted in malignant brain tumors 1 protein-like
dpt	969.692	475.782	0.490653	2.44172e-05	Down	dermatopontin
des	8988.48	3067.97	0.341322	8.31911e-22	Down	desmin
LOC108267313	457.723	206.96	0.45215	0.00146016	Down	desmoglein-2-like
dhdh	427.101	178.124	0.417054	2.8206e-09	Down	dihydrodiol dehydrogenase
LOC108254928	64.969	24.8142	0.381939	0.00935056	Down	dihydropyridine-sensitive L-type skeletal muscle calcium channel subunit alpha-1-like
LOC108266034	2241.49	1071.01	0.477814	6.01078e-10	Down	dihydropyridine-sensitive L-type skeletal muscle calcium channel subunit alpha-1-like
LOC108257966	1821.63	865.64	0.475201	7.29204e-08	Down	dimethylaniline monooxygenase [N-oxide-forming] 5-like
LOC108267138	40.1644	10.0032	0.249057	0.00782479	Down	discoidin domain-containing receptor 2-like
dnd1	33.2911	0	0	8.94367e-13	Down	DND microRNA-mediated repression inhibitor 1
LOC108271324	118.543	45.2844	0.382009	0.00244419	Down	D-threo-3-hydroxyaspartate dehydratase-like
LOC108263393	28.324	2.4241	0.0855848	3.40966e-06	Down	dual specificity protein phosphatase 13-like
LOC108273859	172.32	78.6636	0.456496	5.28617e-05	Down	dual specificity protein phosphatase 13-like
LOC108273861	33.2256	7.25135	0.218246	0.000434081	Down	dual specificity protein phosphatase 13-like
LOC108276494	58.7069	19.0303	0.324158	0.00032628	Down	dynein heavy chain 12, axonemal-like
LOC108280994	6.24849	0	0	0.0225909	Down	dynein heavy chain 12, axonemal-like
LOC108280995	56.7241	17.2207	0.303588	0.000163479	Down	dynein heavy chain 12, axonemal-like
LOC108280250	28.6142	0	0	9.69449e-05	Down	E3 SUMO-protein ligase PIAS4-like
LOC108257675	54.9683	13.5817	0.247082	0.0259739	Down	E3 ubiquitin/ISG15 ligase TRIM25-like
LOC108258555	52.2301	24.7146	0.473187	0.0269804	Down	E3 ubiquitin/ISG15 ligase TRIM25-like
LOC108261256	24.1961	0	0	2.82905e-09	Down	E3 ubiquitin/ISG15 ligase TRIM25-like
LOC108272572	12.4142	0.306529	0.0246918	0.00152278	Down	E3 ubiquitin/ISG15 ligase TRIM25-like
LOC108277091	64.1848	26.8456	0.418255	0.00356017	Down	E3 ubiquitin/ISG15 ligase TRIM25-like
LOC108255167	1363.59	665.017	0.487694	1.82047e-06	Down	E3 ubiquitin-protein ligase DTX3L-like
LOC108265088	184.719	24.1503	0.130741	2.95244e-06	Down	E3 ubiquitin-protein ligase NEURL3-like
LOC108279000	10.9393	0.898343	0.0821206	0.0110802	Down	E3 ubiquitin-protein ligase RBX1-like
LOC108268539	10.041	0.299642	0.0298417	0.0033916	Down	E3 ubiquitin-protein ligase RNF12-B-like
LOC108257521	719.892	248.213	0.344791	0.000281583	Down	E3 ubiquitin-protein ligase RNF138-like
LOC108267872	514.503	213.477	0.414919	4.32379e-10	Down	E3 ubiquitin-protein ligase RNF138-like
LOC108258107	117.949	35.0145	0.296861	5.61679e-08	Down	E3 ubiquitin-protein ligase RNF170-like
LOC108260922	253.43	40.4982	0.1598	2.04639e-24	Down	E3 ubiquitin-protein ligase TRIM39-like
LOC108261457	21.7543	6.04706	0.277971	0.0221568	Down	E3 ubiquitin-protein ligase TRIM39-like
LOC108267738	29.6921	10.0176	0.337383	0.0499088	Down	E3 ubiquitin-protein ligase TRIM39-like
LOC108267933	93.1228	34.3817	0.369208	0.00325786	Down	E3 ubiquitin-protein ligase TRIM39-like
LOC108267937	46.7653	19.6353	0.419869	0.0137356	Down	E3 ubiquitin-protein ligase TRIM39-like
entpd5	603.801	289.437	0.479359	1.14353e-07	Down	ectonucleoside triphosphate diphosphohydrolase 5
egfl7	121.676	58.9799	0.484729	0.00376737	Down	EGF like domain multiple 7
LOC108280653	2609.69	706.891	0.270872	6.03995e-29	Down	elastin-like
LOC108256503	832.557	0.598993	0.000719461	6.71584e-45	Down	elongation factor 1-alpha-like
elovl6	1444.44	375.81	0.260178	5.27393e-28	Down	ELOVL fatty acid elongase 6
LOC108265404	33.0357	3.59454	0.108808	0.000149648	Down	embryonic polyadenylate-binding protein B-like
LOC108276321	207.407	96.815	0.466787	3.32824e-05	Down	EMILIN-3-like
ebpl	334.428	83.2413	0.248907	1.56116e-18	Down	emopamil binding protein like
LOC108261677	73.7837	30.503	0.413411	0.00131108	Down	endonuclease domain-containing 1 protein-like
LOC108261942	66.9622	28.6067	0.427207	0.00367938	Down	endonuclease domain-containing 1 protein-like
LOC108278468	374.75	105.098	0.280449	9.99327e-17	Down	endosialin-like
en1	107.348	51.6169	0.480837	0.0257298	Down	engrailed homeobox 1
eno3	21501.9	10483.4	0.487558	0.0109686	Down	enolase 3
eno4	43.4219	20.1723	0.464565	0.0429127	Down	enolase family member 4
LOC108256317	98.408	25.1115	0.255178	2.18576e-08	Down	eotaxin-like
LOC108271501	162.142	78.2	0.482294	0.000257638	Down	ephexin-1-like
LOC108269451	79.97	21.1757	0.264796	7.21088e-07	Down	ER membrane protein complex subunit 7-like
LOC108268423	911.738	398.691	0.437287	2.02206e-10	Down	ES1 protein homolog, mitochondrial-like
eif4a2	493.673	235.916	0.477879	3.19404e-07	Down	eukaryotic translation initiation factor 4A2
LOC108276052	408.633	186.238	0.455757	0.000894846	Down	extracellular matrix protein 2-like
fam198a	24.7662	5.46068	0.220489	0.00304719	Down	family with sequence similarity 198 member A
fam84a	90.8407	43.4337	0.47813	0.00369282	Down	family with sequence similarity 84 member A
fitm1	88.8643	42.0656	0.473369	0.00378511	Down	fat storage inducing transmembrane protein 1
fabp1	5785.74	1918.45	0.331583	6.51659e-10	Down	fatty acid binding protein 1
fabp2	1995.9	947.39	0.474667	0.0235606	Down	fatty acid binding protein 2
LOC108257690	673.704	178.873	0.265506	1.90631e-10	Down	fatty acid-binding protein, brain-like
LOC108258710	1693.37	480.439	0.283717	1.54113e-25	Down	fatty acid-binding protein, brain-like
LOC108261865	544.518	211.595	0.388592	0.0306346	Down	fatty acid-binding protein, brain-like
LOC108267965	826.059	281.253	0.340475	1.76231e-09	Down	fatty-acid amide hydrolase 2-B-like
fbxl22	17.6955	3.92891	0.222028	0.0191006	Down	F-box and leucine rich repeat protein 22
LOC108278130	52.5546	24.4129	0.464525	0.0290822	Down	F-box only protein 15-like
LOC108274011	151.82	71.2234	0.469129	0.011367	Down	ferritin, middle subunit-like
LOC108270510	5655.85	1947.95	0.344413	0.00692982	Down	fetuin-B-like
LOC108270536	947.015	257.115	0.2715	5.74653e-13	Down	fetuin-B-like
LOC108275687	163.996	61.1328	0.372771	6.05079e-07	Down	FH2 domain-containing protein 1-like
fbn3	242.505	118.558	0.488887	0.00298336	Down	fibrillin 3
LOC108269308	253.959	126.663	0.498754	4.26145e-05	Down	fibroblast growth factor 6-like
LOC108279521	46.7689	17.77	0.379954	0.0069362	Down	fibroblast growth factor 6-like
LOC108265732	90.2117	18.0467	0.200048	8.99119e-10	Down	fibroblast growth factor receptor 1-A-like
LOC108263898	61.7492	22.9075	0.370976	0.00113156	Down	fibulin-7-like
LOC108274993	130	53.6164	0.412435	3.63088e-05	Down	fibulin-7-like
filip1l	356.187	83.2655	0.233769	1.82604e-20	Down	filamin A interacting protein 1 like
fkbp1b	1201.95	578.774	0.481527	9.03865e-09	Down	FK506 binding protein 1B
fkbp6	16.4242	3.60685	0.219606	0.0269726	Down	FK506 binding protein 6
LOC108258175	524.421	228.769	0.43623	4.2092e-09	Down	FK506-binding protein 5-like
LOC108268285	6823.09	2245.99	0.329175	1.18524e-22	Down	flavin-containing monooxygenase FMO GS-OX4-like
figla	6.57329	0	0	0.017089	Down	folliculogenesis specific bHLH transcription factor
LOC108275494	106.677	43.6866	0.40952	0.000130474	Down	forkhead box protein L2-like
LOC108280919	161.844	58.6778	0.362558	2.65413e-07	Down	forkhead box protein L2-like
LOC108268192	540.134	240.262	0.444819	8.59377e-09	Down	forkhead box protein Q1-like
foxr1	59.4702	0.598701	0.0100672	1.87689e-12	Down	forkhead box R1
ftcd	1017.81	300.275	0.295021	0.000283375	Down	formimidoyltransferase cyclodeaminase
fhl1	1302.67	542.064	0.416118	0.0101978	Down	four and a half LIM domains 1
LOC108270008	158.686	43.391	0.273439	1.7344e-09	Down	four and a half LIM domains protein 2-like
frem3	611.477	74.4003	0.121673	1.36875e-46	Down	FRAS1 related extracellular matrix 3
LOC108271303	211.201	75.0453	0.355327	4.59444e-05	Down	FRAS1-related extracellular matrix protein 1-like
LOC108267731	28.1336	0.29935	0.0106403	3.6835e-09	Down	gametocyte-specific factor 1-like
LOC108264906	35.7368	12.7339	0.356324	0.0423625	Down	gamma-glutamyltranspeptidase 1-like
LOC108257191	123.282	55.9091	0.453507	0.00790493	Down	gap junction beta-4 protein-like
LOC108266400	19676.5	7878.44	0.400398	0.00145716	Down	gastricsin-like
LOC108266401	24381.7	10344.8	0.424286	0.012786	Down	gastricsin-like
LOC108269540	20.8596	0	0	5.30799e-08	Down	gastrula zinc finger protein XlCGF57.1-like
LOC108272068	35.8815	9.68175	0.269826	0.00138375	Down	gastrula zinc finger protein XlCGF7.1-like
LOC108266041	293.377	139.126	0.474221	0.000548748	Down	GATA-binding factor 1-B-like
LOC108255504	193.962	22.9712	0.118432	1.30482e-08	Down	gelsolin-like
gen1	72.6823	34.7046	0.477483	0.00994706	Down	GEN1, Holliday junction 5' flap endonuclease
LOC108260038	85.7108	31.9573	0.37285	0.000165539	Down	globoside alpha-1,3-N-acetylgalactosaminyltransferase 1-like
gck	542.883	35.8808	0.066093	0.000146553	Down	glucokinase
gckr	114.41	36.6672	0.320489	0.0258605	Down	glucokinase (hexokinase 4) regulator
gpi	5506.71	2145.2	0.389561	0.00107097	Down	glucose-6-phosphate isomerase
gaa	228.668	114.057	0.498789	0.000100421	Down	glucosidase alpha, acid
grin3b	30.1791	11.4368	0.378965	0.0365922	Down	glutamate ionotropic receptor NMDA type subunit 3B
LOC108255192	1052.86	415.594	0.394728	2.46173e-13	Down	glutathione peroxidase 1-like
gpx7	79.2556	30.8164	0.388823	0.000436401	Down	glutathione peroxidase 7
gstt2b	975.531	388.644	0.398392	6.00388e-10	Down	glutathione S-transferase theta 2B
gatm	381.357	50.0994	0.131371	1.11951e-35	Down	glycine amidinotransferase
LOC108263175	215.087	94.2402	0.43815	0.00688023	Down	glycine N-acyltransferase-like
LOC108280749	421.086	147.038	0.349189	0.013071	Down	glycine-rich cell wall structural protein 1-like
gys2	2452.02	1001.13	0.408288	0.0409635	Down	glycogen synthase 2
glt8d2	126.863	62.9509	0.496211	0.0035013	Down	glycosyltransferase 8 domain containing 2
LOC108280917	260.665	128.858	0.494342	3.4039e-05	Down	glypican-5-like
LOC108274528	294.527	127.202	0.431886	0.0472542	Down	Golgi-associated plant pathogenesis-related protein 1-like
LOC108260269	35.6222	7.25135	0.203563	0.000155432	Down	growth arrest-specific protein 1-like
gdf3	28.2169	1.19857	0.042477	9.96785e-08	Down	growth differentiation factor 3
LOC108258417	42.631	9.93833	0.233125	0.00010335	Down	GTPase IMAP family member 8-like
LOC108272945	176.361	54.8	0.310726	6.18493e-05	Down	GTPase IMAP family member 8-like
gda	3308.6	1548.17	0.467922	9.64761e-11	Down	guanine deaminase
LOC108280463	537.207	217.659	0.405168	9.86607e-11	Down	guanylate-binding protein 1-like
LOC108264928	143.513	57.7051	0.402091	1.01761e-05	Down	H-2 class II histocompatibility antigen, A-U alpha chain-like
LOC108265443	3163.05	463.196	0.14644	8.53163e-59	Down	H-2 class II histocompatibility antigen, I-E beta chain-like
hspb1	2167.29	960.452	0.443158	1.31758e-05	Down	heat shock protein family B (small) member 1
hspb2	55.5905	22.6791	0.407967	0.00546622	Down	heat shock protein family B (small) member 2
hhatl	946.247	393.787	0.416156	2.02859e-05	Down	hedgehog acyltransferase-like
hfe2	78.2085	36.4878	0.466545	0.00484796	Down	hemochromatosis type 2 (juvenile)
hemgn	516.227	256.082	0.496065	1.31388e-06	Down	hemogen
hbae	2073.69	437.89	0.211164	0.00015518	Down	hemoglobin embryonic subunit alpha
hba	15400.4	5210	0.338302	4.36264e-05	Down	hemoglobin subunit alpha
LOC108257040	4709.09	1522.29	0.323265	0.0003922	Down	hemoglobin subunit alpha-like
LOC108257041	3284.16	902.369	0.274764	4.99064e-05	Down	hemoglobin subunit alpha-like
LOC108257038	2614.35	783.041	0.299516	2.75687e-06	Down	hemoglobin subunit beta
hbb	3233.29	702.851	0.217379	3.91532e-05	Down	hemoglobin subunit beta
LOC108257036	6327.95	2241.87	0.354281	4.37609e-06	Down	hemoglobin subunit beta-like
LOC100304620	6042.28	1518.99	0.251394	3.53794e-09	Down	hemoglobin-beta
LOC108276868	555.693	223.128	0.401532	4.4836e-11	Down	histamine N-methyltransferase-like
LOC108279598	74.748	31.9863	0.427922	0.00240408	Down	histidine ammonia-lyase-like
LOC108260171	135.766	0	0	1.70439e-12	Down	histone H1-beta, late embryonic-like
LOC108276198	118.577	0.29935	0.00252453	8.30497e-11	Down	histone H2B type 1-A-like
LOC108258275	25.7607	4.79854	0.186274	0.00323107	Down	homeobox protein engrailed-2a-like
LOC108269487	62.0018	30.8242	0.49715	0.0318733	Down	homeobox protein HMX3-like
LOC108263091	17.858	4.23514	0.237156	0.0251384	Down	homeobox protein SIX1-like
LOC108255354	425.307	188.071	0.442201	0.00103828	Down	homer protein homolog 1-like
hgd	3945.26	635.475	0.161073	2.52838e-16	Down	homogentisate 1,2-dioxygenase
htra4	111.41	49.5815	0.445037	0.000436565	Down	HtrA serine peptidase 4
LOC108256055	4605.48	1981.11	0.430163	0.00205012	Down	hyaluronan and proteoglycan link protein 1-like
LOC108263719	3801.75	1171.27	0.308087	8.6239e-06	Down	hyaluronan-binding protein 2-like
LOC108274445	621.333	216.571	0.348559	1.30958e-07	Down	hyaluronidase PH-20-like
LOC108274447	14.7974	2.9938	0.202319	0.0288666	Down	hyaluronidase PH-20-like
hykk	490.058	213.318	0.435292	0.0135653	Down	hydroxylysine kinase
hsd17b1	7.39521	0.306529	0.0414497	0.0290247	Down	hydroxysteroid 17-beta dehydrogenase 1
LOC108259908	96.502	33.8455	0.350724	2.10207e-05	Down	Ig heavy chain Mem5-like
LOC108256587	8157.69	2375.25	0.291167	5.93278e-28	Down	IgGFc-binding protein-like
LOC108273353	12105.1	4634.75	0.382877	0.00166538	Down	IgGFc-binding protein-like
LOC108272198	4096.98	1635.09	0.399096	1.08053e-15	Down	immunoglobulin-like and fibronectin type III domain-containing protein 1
LOC108277302	193.702	0.898051	0.00463624	2.39716e-08	Down	importin subunit alpha-5-like
LOC108272031	31.5502	6.93852	0.21992	0.000819815	Down	inhibin beta B chain-like
insc	278.06	129.393	0.465343	4.35411e-06	Down	inscuteable homolog (Drosophila)
LOC108257360	571.471	204.192	0.35731	0.000257638	Down	insulin-like growth factor-binding protein complex acid labile subunit
itga11	171.152	81.4808	0.476072	0.000125549	Down	integrin subunit alpha 11
LOC108260692	529.082	131.316	0.248196	3.78674e-08	Down	intelectin-like
LOC108272488	174.438	77.946	0.446841	2.4463e-05	Down	interaptin-like
LOC100304694	55.5046	4.5342	0.0816905	1.05348e-11	Down	interferon gamma 1
LOC100305073	31.4259	9.37552	0.298337	0.0128371	Down	interferon gamma 2a
LOC108260792	614.973	307.465	0.499964	0.00122585	Down	interferon regulatory factor 1-like
LOC108278857	2562.44	746.503	0.291326	3.88869e-26	Down	interferon regulatory factor 1-like
LOC108275783	494.716	246.493	0.498253	8.92144e-05	Down	interferon regulatory factor 4-like
LOC108258862	742.675	202.594	0.27279	2.39841e-07	Down	interferon-induced GTP-binding protein Mx3-like
LOC108258858	143.845	70.3486	0.489059	0.000641557	Down	interferon-induced GTP-binding protein Mx-like
LOC108258363	79.4688	20.8276	0.262085	0.00429194	Down	interferon-induced protein 44-like
LOC108258366	228.932	29.5909	0.129256	2.80865e-05	Down	interferon-induced protein 44-like
LOC108258367	337.636	52.6078	0.155812	1.89357e-29	Down	interferon-induced protein 44-like
LOC108258369	562.189	132.777	0.236179	1.11529e-24	Down	interferon-induced protein 44-like
LOC108258370	91.3724	36.1792	0.395954	0.00026399	Down	interferon-induced protein 44-like
LOC108258373	82.1363	19.5685	0.238244	7.27917e-08	Down	interferon-induced protein 44-like
LOC108258395	429.883	175.355	0.407914	1.32431e-08	Down	interferon-induced protein 44-like
LOC108259083	188.17	85.5452	0.454616	0.0303476	Down	interferon-induced protein 44-like
LOC108261208	255.935	118.239	0.461988	2.101e-05	Down	interferon-induced protein 44-like
LOC108261227	26.2617	6.02465	0.229408	0.00331508	Down	interferon-induced protein 44-like
LOC108261259	392.316	87.8732	0.223986	2.02943e-22	Down	interferon-induced protein 44-like
LOC108261261	186.434	49.2741	0.264298	1.55842e-12	Down	interferon-induced protein 44-like
LOC108261262	59.8394	21.3643	0.357027	0.000862474	Down	interferon-induced protein 44-like
LOC108262052	660.182	111.248	0.168511	8.57678e-10	Down	interferon-induced protein 44-like
LOC108273485	47.2869	20.5342	0.434247	0.0201291	Down	interferon-induced protein with tetratricopeptide repeats 5-like
LOC108274515	41.3325	10.8405	0.262274	0.0014186	Down	interferon-induced transmembrane protein 3-like
LOC108274514	436.074	213.927	0.490574	1.91047e-06	Down	interferon-induced transmembrane protein 5-like
LOC108273839	291.095	123.375	0.42383	0.00142131	Down	interferon-induced very large GTPase 1-like
il12b	46.2994	17.8042	0.384545	0.00700695	Down	interleukin 12B
il17rel	411.457	174.8	0.424832	6.01176e-09	Down	interleukin 17 receptor E like
il4i1	163.621	67.9382	0.415217	0.00644379	Down	interleukin 4 induced 1
LOC108264170	65.8841	29.3024	0.444757	0.00617142	Down	interleukin-12 subunit beta-like
LOC108269793	87.4728	8.76964	0.100256	1.27596e-15	Down	interleukin-17F-like
LOC108262818	299.036	70.8721	0.237002	1.86611e-18	Down	interleukin-22 receptor subunit alpha-2-like
LOC108257365	39.4392	13.6104	0.345097	0.00651967	Down	interleukin-4 receptor subunit alpha-like
LOC108265493	85.1174	21.5661	0.253368	0.00250848	Down	kazal-type serine protease inhibitor domain-containing protein 1-like
klhl35	114.879	9.66798	0.0841576	0.000331572	Down	kelch like family member 35
LOC108274133	28.041	3.62238	0.129182	5.45571e-05	Down	kelch repeat and BTB domain-containing protein 13-like
LOC108260553	118.228	3.62179	0.0306341	1.19076e-30	Down	kelch-like protein 33
LOC108260668	42.4927	11.802	0.277741	0.00065493	Down	kelch-like protein 33
LOC108255341	232.797	103.469	0.444462	3.82177e-06	Down	keratin, type I cytoskeletal 18-like
LOC108266441	1328.47	538.392	0.405271	2.9793e-13	Down	keratin, type I cytoskeletal 18-like
LOC108257048	2635.88	957.776	0.363361	4.6005e-18	Down	keratin, type I cytoskeletal 50 kDa-like
kera	265.808	91.381	0.343786	1.1867e-07	Down	keratocan
LOC108272700	38.8319	8.7676	0.225783	0.0177989	Down	kinesin heavy chain-like
LOC108267807	96.1539	6.03988	0.0628147	0.000283375	Down	kinesin-like protein KIF20A
LOC108265365	11.2156	1.82482	0.162703	0.0418654	Down	kinesin-like protein KIF2A
kng1	7118.89	2986.69	0.419544	0.0499088	Down	kininogen 1
kl	69.584	32.4688	0.466613	0.0192057	Down	klotho
LOC108260321	120.114	43.2986	0.36048	4.22969e-06	Down	kynurenine--oxoglutarate transaminase 1-like
LOC108263616	359.495	176.197	0.490124	4.67767e-06	Down	lactosylceramide alpha-2,3-sialyltransferase-like
lama4	1259.84	607.928	0.482546	9.02402e-09	Down	laminin subunit alpha 4
LOC108270685	754.105	300.772	0.398847	0.000167271	Down	laminin subunit alpha-3-like
LOC108271276	89.974	0.606171	0.00673718	9.30846e-05	Down	la-related protein 6-like
LOC108260489	83.2618	0	0	2.22947e-22	Down	late histone H2B.L4-like
lmod1	143.149	68.8176	0.48074	0.00258996	Down	leiomodin 1
LOC108274662	96.902	43.0799	0.444572	0.0450851	Down	leucine-rich repeat and immunoglobulin-like domain-containing nogo receptor-interacting protein 1
lect1	310.084	97.4247	0.314188	6.62255e-12	Down	leukocyte cell derived chemotaxin 1
ltc4s	67.8326	28.4666	0.41966	0.00269594	Down	leukotriene C4 synthase
lhx8	37.3186	9.96015	0.266895	0.00112768	Down	LIM homeobox 8
LOC100304644	77.9359	36.4975	0.468302	0.00525341	Down	liver-expressed antimicrobial peptide 2
LOC108279226	249.492	31.2116	0.125101	0.00159495	Down	liver-expressed antimicrobial peptide 2-like
LOC108279788	42.5453	4.52043	0.10625	0.00235928	Down	low affinity vacuolar monovalent cation/H(+) antiporter-like
LOC108277154	153.743	31.3497	0.20391	0.00865745	Down	low-density lipoprotein receptor-related protein 2-like
lsm14b	97.2243	0.898926	0.0092459	5.86594e-19	Down	LSM family member 14B
LOC108279748	1801.82	753.446	0.418158	4.58279e-13	Down	lumican-like
lysc	25042.6	10276.9	0.410379	1.95319e-15	Down	lysozyme c
mb21d1	191.573	77.3528	0.403776	9.18698e-07	Down	Mab-21 domain containing 1
LOC108258358	51.4843	20.5432	0.399018	0.00617226	Down	macrophage mannose receptor 1-like
LOC108258868	63.4349	28.3289	0.446582	0.00735053	Down	macrophage mannose receptor 1-like
LOC108270242	27.7092	8.44216	0.30467	0.0125334	Down	macrophage mannose receptor 1-like
LOC108268871	502.507	190.434	0.378968	4.94875e-05	Down	malate synthase-like
LOC108280878	3021.86	1468.55	0.485975	0.0432044	Down	MAM and LDL-receptor class A domain-containing protein 1-like
mamdc2	130.76	54.5106	0.416876	5.37332e-05	Down	MAM domain containing 2
LOC108277069	261.239	96.383	0.368946	3.8387e-05	Down	MAM domain-containing protein 2-like
LOC108258154	254.018	2.41663	0.00951363	1.57527e-08	Down	maternal DNA replication licensing factor mcm3-like
LOC108280894	41.3016	1.5114	0.0365943	8.55847e-09	Down	maternal DNA replication licensing factor mcm6-like
matn1	687.639	226.201	0.328953	2.65407e-08	Down	matrilin 1, cartilage matrix protein
LOC108269328	514.212	143.969	0.27998	2.62632e-19	Down	matrix-remodeling-associated protein 5-like
mtbp	89.2074	43.4467	0.48703	0.0458377	Down	MDM2 binding protein
mia	89.638	32.9538	0.367632	7.25787e-05	Down	melanoma inhibitory activity
LOC108272384	71.1203	24.7685	0.348262	0.000208066	Down	membrane-spanning 4-domains subfamily A member 18-like
mep1b	2890.11	933.898	0.323136	2.30569e-10	Down	meprin A subunit beta
LOC108267869	706.777	266.622	0.377236	3.38458e-13	Down	meprin A subunit beta-like
meox1	137.23	63.6853	0.464077	0.000318366	Down	mesenchyme homeobox 1
mettl11b	33.7609	10.5397	0.312185	0.00630607	Down	methyltransferase like 11B
LOC108258810	8772.73	3780.16	0.430899	7.42667e-14	Down	microfibril-associated glycoprotein 4-like
msmb	5123.94	1619.03	0.315974	1.83104e-15	Down	microseminoprotein beta
LOC108263461	102.433	27.4153	0.267642	4.27386e-08	Down	microsomal triglyceride transfer protein large subunit-like
map1lc3c	112.841	3.33709	0.0295734	9.43368e-07	Down	microtubule associated protein 1 light chain 3 gamma
LOC108265086	55.5151	7.51568	0.135381	2.6822e-05	Down	microtubule-associated protein RP/EB family member 1-like
LOC108278275	31061	5770.69	0.185786	3.6917e-51	Down	mid1-interacting protein 1A-like
mis18a	45.1627	21.4661	0.475306	0.0467639	Down	MIS18 kinetochore protein A
ghc1	3925.45	1256.05	0.319978	3.01364e-23	Down	mitochondrial glutamate carrier 1
LOC108268301	111.838	50.1828	0.44871	0.00043359	Down	monocyte chemotactic protein 1B-like
LOC108258289	35.6779	12.6509	0.354587	0.0127985	Down	MORC family CW-type zinc finger protein 3-like
mov10l1	89.1697	1.50422	0.0168692	9.78487e-13	Down	Mov10 RISC complex RNA helicase like 1
LOC108267511	5089.54	2401.99	0.471947	1.81689e-09	Down	M-protein, striated muscle-like
LOC108268132	11931.3	5758.63	0.482649	2.05297e-08	Down	M-protein, striated muscle-like
LOC108280038	80.1153	2.11098	0.0263492	8.50513e-23	Down	mucin-2-like
LOC108254853	489.447	0.898635	0.00183602	3.60319e-10	Down	mucin-5AC-like
LOC108271167	1971.92	712.49	0.361318	0.00380421	Down	mucin-5AC-like
LOC108272125	181.438	1.20516	0.0066423	1.79389e-09	Down	mucin-5AC-like
LOC108274765	4399.88	1966.76	0.447003	1.44507e-08	Down	mucin-5AC-like
LOC108278385	113.334	46.2439	0.408031	7.07646e-05	Down	multiple epidermal growth factor-like domains protein 6
LOC108269684	2194.74	630.579	0.287314	5.72581e-09	Down	multiple inositol polyphosphate phosphatase 1-like
murc	803.521	361.332	0.449686	1.34191e-09	Down	muscle-related coiled-coil protein
msc	25.3154	7.86441	0.310657	0.0209644	Down	musculin
LOC108256270	12.8288	1.83917	0.143363	0.0161268	Down	myeloid cell surface antigen CD33-like
LOC108275479	83.221	30.7955	0.370045	0.000150512	Down	myeloid-associated differentiation marker-like protein 2
LOC108277335	1066.86	330.406	0.3097	1.63601e-20	Down	myocardin-like
myom2	20228.8	9124.28	0.451053	8.91102e-07	Down	myomesin 2
mybpc3	991.872	461.362	0.465142	0.00129654	Down	myosin binding protein C, cardiac
mybpc2	4376.05	1563.3	0.357241	3.87455e-07	Down	myosin binding protein C, fast type
mybpc1	2695.25	652.557	0.242114	7.23598e-08	Down	myosin binding protein C, slow type
LOC108254796	17029.1	4738.61	0.278265	9.13491e-09	Down	myosin heavy chain, fast skeletal muscle
LOC108254799	5163.61	2057.71	0.398502	7.17523e-16	Down	myosin heavy chain, fast skeletal muscle-like
LOC108254800	43669.1	14812.3	0.339194	4.11452e-06	Down	myosin heavy chain, fast skeletal muscle-like
LOC108254801	2664.9	1046.96	0.392871	0.000529076	Down	myosin heavy chain, fast skeletal muscle-like
LOC108261437	15554.8	7341.93	0.472003	1.82047e-06	Down	myosin heavy chain, fast skeletal muscle-like
LOC108261475	17862.7	7244.97	0.405593	6.31272e-16	Down	myosin heavy chain, fast skeletal muscle-like
LOC108261476	18166.3	4584.07	0.252339	3.98742e-05	Down	myosin heavy chain, fast skeletal muscle-like
LOC108261508	40299.6	16190.4	0.401752	2.90842e-12	Down	myosin heavy chain, fast skeletal muscle-like
LOC108261842	546.918	234.727	0.429181	0.00430582	Down	myosin heavy chain, fast skeletal muscle-like
LOC108262054	24684.4	8390.05	0.339893	3.48934e-22	Down	myosin heavy chain, fast skeletal muscle-like
LOC108262121	1028.77	507.625	0.49343	0.0100198	Down	myosin heavy chain, fast skeletal muscle-like
LOC108262284	2873.95	1058.37	0.368264	1.15259e-17	Down	myosin heavy chain, fast skeletal muscle-like
LOC108262442	6868.56	2199.68	0.320253	0.00078224	Down	myosin heavy chain, fast skeletal muscle-like
LOC108262733	173.315	80.1027	0.46218	7.16205e-05	Down	myosin heavy chain, fast skeletal muscle-like
LOC108271865	639.525	86.3898	0.135084	6.75608e-44	Down	myosin heavy chain, fast skeletal muscle-like
LOC108281040	2180.66	972.326	0.445886	1.00821e-11	Down	myosin heavy chain, fast skeletal muscle-like
LOC108262116	1251.91	550.801	0.43997	0.00957968	Down	myosin heavy chain, skeletal muscle-like
LOC108267032	72439.1	31669.6	0.43719	0.000493711	Down	myosin light chain 1, skeletal muscle isoform-like
mle3	109555	46646.2	0.425778	0.000229813	Down	myosin light chain 3 skeletal muscle isoform
LOC108268043	305.715	134.702	0.440615	3.55742e-07	Down	myosin light chain kinase 3-like
LOC108273224	4286.93	2087.18	0.486872	6.79158e-10	Down	myosin light chain kinase, smooth muscle-like
LOC108274226	6735.04	3322.75	0.493353	8.10259e-08	Down	myosin regulatory light chain 2, skeletal muscle isoform
LOC108276823	5703.41	2488.67	0.436347	0.00164469	Down	myosin regulatory light chain 2B, cardiac muscle isoform-like
LOC108262690	210.023	99.8534	0.47544	4.71054e-05	Down	myosin-13-like
LOC108281060	20.9458	5.74684	0.274367	0.0234996	Down	myosin-2-like
LOC108270642	698.163	326.467	0.467609	0.00877239	Down	myosin-4-like
LOC108262146	2139.09	719.767	0.336482	4.99231e-20	Down	myosin-6-like
LOC108262569	945.062	433.899	0.459122	0.00247402	Down	myosin-6-like
LOC108279277	36.8765	15.7504	0.427111	0.0372036	Down	myosin-6-like
LOC108271481	1446.32	69.0848	0.0477659	5.86594e-19	Down	myosin-7
LOC108261464	2459.27	1086.4	0.441758	5.16989e-10	Down	myosin-7-like
LOC108262499	36.9902	10.2822	0.277971	0.00164944	Down	myosin-7-like
LOC108270535	200.866	61.7582	0.30746	0.0336372	Down	myosin-7-like
LOC108271487	7132.46	3122.49	0.437786	0.00347543	Down	myosin-7-like
LOC108272997	39229.1	18568	0.473321	5.24467e-11	Down	myosin-binding protein C, fast-type-like
mstn	156.798	58.1327	0.370749	0.000168622	Down	myostatin
myoz1	6211.41	2857.35	0.460016	2.03118e-11	Down	myozenin 1
myoz2	416.738	176.352	0.423171	0.00127829	Down	myozenin 2
myoz3	589.557	175.247	0.297251	2.16657e-18	Down	myozenin 3
LOC108273564	1440.07	643.396	0.446781	1.56839e-10	Down	myozenin-1-like
LOC108274795	224.111	94.2262	0.420444	0.000197472	Down	Na(+)/H(+) exchanger beta-like
LOC108264344	29.4395	5.1329	0.174354	0.000212647	Down	NACHT, LRR and PYD domains-containing protein 8-like
LOC108256021	2202.73	947.714	0.430246	1.52138e-12	Down	natterin-3-like
ndp	48.7381	24.1239	0.494971	0.0481611	Down	NDP, norrin cystine knot growth factor
neurl2	120.75	42.4413	0.35148	6.62388e-05	Down	neuralized E3 ubiquitin protein ligase 2
LOC108278037	205.901	50.3766	0.244665	2.51529e-14	Down	neutral cholesterol ester hydrolase 1-like
nips1	254.266	90.3642	0.355393	9.33113e-10	Down	nipsnap-like 1
nos2	2709.96	534.664	0.197296	3.71238e-43	Down	nitric oxide synthase 2
nkx2-3	54.9314	25.5549	0.465215	0.0208254	Down	NK2 homeobox 3
LOC100305074	271.323	102.059	0.376152	2.97625e-09	Down	NK-lysin type 3
nlrc5	531.442	257.79	0.485078	0.00688891	Down	NLR family CARD domain containing 5
nobox	56.1784	1.82511	0.0324877	8.31933e-16	Down	NOBOX oogenesis homeobox
LOC108257885	57.6773	27.7948	0.481902	0.026377	Down	noggin-2-like
LOC100305002	223.616	83.8355	0.374908	2.12151e-05	Down	novel immune-type receptor 14
LOC108276528	220.636	0.306529	0.00138929	3.54327e-16	Down	nuclear pore complex protein DDB_G0274915-like
LOC108257106	2012.16	481.376	0.239233	7.74488e-15	Down	nuclear receptor subfamily 5 group A member 2-like
LOC108265710	72.8861	3.61403	0.0495846	1.02121e-17	Down	nucleoplasmin ATPase-like
LOC108276815	465.355	2.40198	0.00516161	1.20095e-15	Down	nucleoplasmin ATPase-like
obsl1	627.61	297.607	0.474191	6.31853e-08	Down	obscurin-like 1
olfml3	437.315	160.214	0.366357	5.14439e-12	Down	olfactomedin like 3
LOC108268460	56.0814	22.2552	0.396837	0.00427515	Down	olfactomedin-4-like
LOC108257824	339.465	122.356	0.360438	5.9172e-11	Down	olfactomedin-like protein 2B
LOC108277438	118.373	40.0579	0.338404	1.26984e-06	Down	olfactomedin-like protein 2B
LOC108279211	96.4676	0.598701	0.00620624	6.55371e-08	Down	oocyte-specific histone RNA stem-loop-binding protein 2-like
LOC108254842	420.168	181.656	0.432341	7.03322e-05	Down	opioid growth factor receptor-like protein 1
LOC108280998	137.756	66.5591	0.483167	0.039793	Down	opioid growth factor receptor-like protein 1
ogn	741.705	263.911	0.355817	5.47399e-15	Down	osteoglycin
omd	65.8191	20.6112	0.313149	7.02486e-05	Down	osteomodulin
otor	20.7453	4.21477	0.203167	0.00642826	Down	otoraplin
otos	53.4418	16.294	0.304892	0.0030702	Down	otospiralin
LOC108266515	24.2895	7.32827	0.301706	0.0204732	Down	otospiralin-like
LOC108272416	15.4609	3.32991	0.215376	0.0282795	Down	otospiralin-like
LOC108257207	43.4253	14.505	0.334023	0.00297179	Down	P2Y purinoceptor 11-like
LOC108257324	265.498	23.5116	0.0885566	4.71603e-11	Down	P43 5S RNA-binding protein-like
LOC108260158	399.111	130.243	0.326332	7.1604e-13	Down	palmitoyltransferase ZDHHC23-like
LOC108268472	1121.64	3.03716	0.00270779	2.73464e-16	Down	pancreatic secretory granule membrane major glycoprotein GP2-like
LOC108273581	5146.24	1700.86	0.330506	1.95005e-22	Down	pancreatic secretory granule membrane major glycoprotein GP2-like
LOC108263057	1519.29	585.855	0.38561	0.00880355	Down	pancreatic triacylglycerol lipase-like
LOC108281088	40.0576	9.95327	0.248474	0.000305857	Down	parathyroid hormone-related protein-like
LOC108273406	86174	40528.9	0.470315	2.07744e-11	Down	parvalbumin alpha
prvu	1170.73	428.489	0.366002	1.80358e-08	Down	parvalbumin thymic cpv3
prv7	6561.39	2076.16	0.316421	0.00245952	Down	parvalbumin-7
LOC108263728	1124.55	445.219	0.395908	1.0363e-13	Down	PAS domain-containing serine/threonine-protein kinase-like
patl2	25.2844	1.81104	0.0716268	0.0153053	Down	PAT1 homolog 2
pdli3	169.372	76.1158	0.4494	0.00136812	Down	pdz and lim domain protein 3
LOC108268957	548.163	266.85	0.486808	0.000943816	Down	PDZ and LIM domain protein 3-like
LOC108270428	479.482	134.431	0.280366	0.0119155	Down	pentraxin fusion protein-like
LOC108280715	33.1768	9.31033	0.280628	0.00335381	Down	perforin-1-like
postn	1227.92	345.391	0.281281	1.80526e-24	Down	periostin
pitpnc1	162.334	53.447	0.329241	1.192e-05	Down	phosphatidylinositol transfer protein, cytoplasmic 1
LOC108267486	232.056	50.5391	0.217788	6.13033e-10	Down	phosphoglucomutase-1-like
pla2g1b	2280.28	618.326	0.271162	0.0375649	Down	phospholipase A2 group IB
LOC108269896	169.829	59.769	0.351936	0.000268742	Down	phospholipase B1, membrane-associated-like
LOC108270472	158.282	78.6186	0.496698	0.00107488	Down	phospholipid-metabolizing enzyme A-C1-like
LOC108279225	768.139	223.916	0.291504	1.33117e-19	Down	phosphorylase b kinase regulatory subunit alpha, skeletal muscle isoform-like
phyhd1	1093.49	527.723	0.482603	1.47761e-08	Down	phytanoyl-CoA dioxygenase domain containing 1
pipox	403.352	191.129	0.473851	7.46318e-07	Down	pipecolic acid and sarcosine oxidase
piwil1	144.094	24.5116	0.170109	3.22658e-10	Down	piwi like RNA-mediated gene silencing 1
piwil2	21.7127	4.23544	0.195067	0.00432968	Down	piwi like RNA-mediated gene silencing 2
LOC108257413	959.513	399.569	0.416429	0.0184625	Down	plasma kallikrein-like
LOC108279219	308.005	0	0	1.68585e-14	Down	plasminogen activator inhibitor 1 RNA-binding protein-like
podn	200.533	95.9187	0.478318	6.06368e-05	Down	podocan
pabpn1l	22.1206	1.80474	0.0815864	0.00763319	Down	poly(A) binding protein nuclear 1 like (cytoplasmic)
LOC108279738	49.1284	17.5094	0.356401	0.00244807	Down	poly(U)-specific endoribonuclease-like
popdc2	435.206	208.272	0.47856	7.46318e-07	Down	popeye domain containing 2
popdc3	166.655	71.8962	0.431408	1.69379e-05	Down	popeye domain containing 3
LOC108277584	101.876	5.10594	0.050119	5.86662e-13	Down	potassium channel subfamily K member 13-like
kctd19	11.1295	1.80328	0.162028	0.0423625	Down	potassium channel tetramerization domain containing 19
LOC108255764	71.3141	35.3271	0.495373	0.0142869	Down	potassium voltage-gated channel subfamily F member 1-like
kcnj11	126.933	48.9024	0.385263	8.89686e-06	Down	potassium voltage-gated channel subfamily J member 11
pou2af1	69.7943	30.1758	0.432354	0.0039449	Down	POU class 2 associating factor 1
LOC108268429	1319.01	198.909	0.150802	1.89655e-18	Down	probable alpha-ketoglutarate-dependent hypophosphite dioxygenase
LOC108267152	72.4821	28.4016	0.391842	0.00782672	Down	probable G-protein coupled receptor 25
LOC108274861	116.143	9.93949	0.0855796	4.91302e-11	Down	programmed cell death 1 ligand 1-like
prelp	1219.77	473.279	0.388006	1.90597e-10	Down	proline and arginine rich end leucine rich repeat protein
LOC108255551	93.3838	3.0165	0.0323022	4.54325e-11	Down	prolow-density lipoprotein receptor-related protein 1-like
p3h3	247.697	121.929	0.49225	4.26145e-05	Down	prolyl 3-hydroxylase 3
prox1	280.055	129.835	0.463607	3.82177e-06	Down	prospero homeobox 1
ptges3l	525.76	220.343	0.419093	0.000166163	Down	prostaglandin E synthase 3 like
LOC108255954	334.534	140.156	0.418958	2.21122e-06	Down	prostaglandin-H2 D-isomerase-like
LOC108275645	13.16	1.79639	0.136504	0.0188701	Down	proteasome subunit beta type-11-like
LOC108259286	257.79	104.571	0.405646	7.01115e-08	Down	protein C19orf12 homolog
LOC108272327	38.4517	13.5759	0.353065	0.00838648	Down	protein cordon-bleu-like
LOC108255801	45.3147	13.278	0.293018	0.000619023	Down	protein FAM78A-like
LOC108257289	49.7429	15.0583	0.302723	0.000423515	Down	protein NLRC3-like
LOC108261144	39.6947	10.5525	0.265843	0.000597027	Down	protein NLRC3-like
LOC108262085	83.5275	35.3504	0.423218	0.000967876	Down	protein NLRC3-like
LOC108264509	1180.63	524.485	0.444243	6.13033e-10	Down	protein NLRC3-like
LOC108264948	274.91	136.221	0.495511	0.00312061	Down	protein NLRC3-like
LOC108272570	166.576	80.2633	0.481842	0.000173453	Down	protein NLRC3-like
LOC108279574	66.4958	29.5831	0.444887	0.00535212	Down	protein NLRC3-like
LOC108279579	30.5037	11.1587	0.365816	0.025335	Down	protein NLRC3-like
LOC108279582	51.3179	14.1938	0.276586	0.000677542	Down	protein NLRC3-like
ppp1r3b	502.357	127.087	0.252981	1.18943e-21	Down	protein phosphatase 1 regulatory subunit 3B
LOC108269743	424.982	159.308	0.374858	3.15967e-11	Down	protein phosphatase 1 regulatory subunit 3C-like
LOC108275498	168.434	76.7642	0.455753	0.000356436	Down	protein phosphatase 1 regulatory subunit 3D-like
LOC108272706	317.08	5.73878	0.0180988	1.67371e-16	Down	protein S100-A1
LOC108275522	111.25	54.6183	0.490949	0.002253	Down	protein snail homolog Sna-like
LOC108255245	708.637	289.573	0.408635	2.44018e-11	Down	protein SSUH2 homolog
LOC108260482	151.851	35.4437	0.23341	0.00827285	Down	protein translocase subunit SecA-like
LOC108279752	274.776	134.891	0.490913	2.38666e-05	Down	protein Wnt-5b
LOC108275601	4288.24	2091.34	0.487691	8.50625e-10	Down	protein-glutamine gamma-glutamyltransferase K-like
LOC108269048	84.6649	36.4376	0.430374	0.00122068	Down	pseudouridine-metabolizing bifunctional protein C1861.05-like
LOC108272756	792.017	264.474	0.333925	7.75883e-17	Down	purine nucleoside phosphorylase-like
LOC108278514	108.759	0	0	6.97707e-15	Down	putative bifunctional UDP-N-acetylglucosamine transferase and deubiquitinase ALG13
LOC108263122	54.9105	16.6332	0.302914	0.000180304	Down	putative protein MSS51 homolog, mitochondrial
pyroxd2	226.678	101.257	0.446701	0.00121251	Down	pyridine nucleotide-disulphide oxidoreductase domain 2
qsox1	4143.85	1974.83	0.476569	0.0134085	Down	quiescin sulfhydryl oxidase 1
rsph14	132.915	48.2403	0.362941	0.00134777	Down	radial spoke head 14 homolog
rhot1	37.1734	14.1881	0.381674	0.0203979	Down	ras homolog family member T1
LOC108255457	19.9237	0.299642	0.0150395	0.00010265	Down	receptor-type tyrosine-protein phosphatase eta-like
LOC108256157	618.75	285.171	0.460882	0.0383912	Down	receptor-type tyrosine-protein phosphatase H-like
rag2	96.8182	14.3896	0.148625	0.0088587	Down	recombination activating gene 2
LOC108272412	14.2138	1.20546	0.0848086	0.00245828	Down	replication protein A 32 kDa subunit-like
rcor2	52.5507	20.4498	0.389145	0.00496674	Down	REST corepressor 2
rcn3	641.659	273.898	0.426858	4.40364e-10	Down	reticulocalbin 3
rtn2	704.565	336.193	0.477164	1.83748e-07	Down	reticulon 2
LOC108264892	101.461	23.8656	0.235219	2.36046e-09	Down	rhamnose-binding lectin-like
LOC108261752	62.6406	24.5401	0.39176	0.00176072	Down	ribonuclease inhibitor-like
LOC108264987	20.6174	3.62209	0.175681	0.00423909	Down	ribonuclease inhibitor-like
LOC108270067	706.264	321.508	0.455223	3.40194e-09	Down	ribonuclease ZC3H12A-like
LOC108260339	421.692	169.086	0.40097	1.61245e-05	Down	ribonuclease-like
rnf17	66.4197	30.844	0.46438	0.00916278	Down	ring finger protein 17
LOC108255597	42.0471	17.1648	0.408226	0.0202834	Down	RING finger protein 183-like
rnf207	177.864	84.1657	0.473203	0.00334324	Down	ring finger protein 207
rbm46	12.967	2.12417	0.163813	0.0244144	Down	RNA binding motif protein 46
LOC108262836	8.58037	0	0	0.0474161	Down	RNA exonuclease 1 homolog
LOC108266629	94.7034	1.80386	0.0190475	1.1167e-10	Down	RNA-binding protein 44-like
ryr3	6798.86	3356.94	0.493751	9.27135e-10	Down	ryanodine receptor 3
LOC108276530	167.63	76.5087	0.456413	5.96894e-05	Down	S-adenosylmethionine synthase-like
sgcg	716.215	271.672	0.379317	3.11418e-13	Down	sarcoglycan gamma
sln	824.322	82.4542	0.100027	4.89488e-13	Down	sarcolipin
scin	394.895	187.391	0.474533	3.89929e-05	Down	scinderin
sfrp5	262.417	122.169	0.465551	0.000704113	Down	secreted frizzled related protein 5
spp2	3184.14	569.259	0.17878	1.65399e-48	Down	secreted phosphoprotein 2
sparc	33233.1	14050.3	0.42278	1.0469e-14	Down	secreted protein acidic and cysteine rich
LOC108258783	53.1732	15.6651	0.294605	0.000202466	Down	secretory phospholipase A2 receptor-like
LOC108268471	41.1662	8.76993	0.213037	5.68778e-05	Down	seipin-like
LOC108278925	14.0895	3.01621	0.214075	0.0401531	Down	septin-5-like
sdsl	118.426	47.6829	0.40264	5.72336e-05	Down	serine dehydratase like
LOC108268396	373.167	166.7	0.446717	1.3132e-07	Down	serine protease 23-like
LOC108272226	46.3484	14.1827	0.306002	0.0239137	Down	serine protease 27-like
LOC108272229	92.0049	27.4811	0.298692	1.3177e-06	Down	serine protease 27-like
LOC108272230	37.4048	13.6041	0.363698	0.0132855	Down	serine protease 27-like
LOC108255771	832.937	360.45	0.432746	0.000218611	Down	serine protease inhibitor 2.1-like
LOC108268026	126.581	2.09574	0.0165566	5.53934e-08	Down	serine/arginine repetitive matrix protein 2-like
stk31	29.8406	0.9127	0.0305858	1.04185e-08	Down	serine/threonine kinase 31
LOC108256381	139.163	2.99555	0.0215254	1.36858e-37	Down	serine/threonine-protein kinase ICK-like
LOC108277116	208.832	2.41721	0.0115749	1.45377e-28	Down	serine-rich adhesin for platelets-like
LOC108262669	369.881	181.83	0.49159	4.62842e-06	Down	serpin B6-like
serpind1	1963.34	865.069	0.440612	0.035076	Down	serpin family D member 1
serpinf1	3964.91	1176.46	0.296718	3.50902e-26	Down	serpin family F member 1
LOC108260607	69.825	26.2418	0.375822	0.000628582	Down	sialidase-like
LOC108262907	23.8818	4.53508	0.189897	0.00210765	Down	sideroflexin-5-like
LOC108274854	12.7527	2.11098	0.165532	0.0290087	Down	signal-regulatory protein beta-1-like
LOC108274486	184.13	90.1403	0.489548	0.000179441	Down	SITS-binding protein-like
LOC108267285	18.2932	5.15386	0.281735	0.0452004	Down	SLAM family member 8-like
LOC108267287	98.7364	30.2717	0.306591	1.11631e-06	Down	SLAM family member 8-like
LOC108257887	22.1653	3.6215	0.163386	0.00143121	Down	snRNA-activating protein complex subunit 1-like
scn4a	220.94	79.57	0.360142	5.26987e-09	Down	sodium voltage-gated channel alpha subunit 4
LOC108276377	89.1068	43.0543	0.483177	0.00484733	Down	sodium-dependent lysophosphatidylcholine symporter 1-like
LOC108265451	220.516	95.4038	0.432639	4.76515e-06	Down	solute carrier family 2, facilitated glucose transporter member 6-like
LOC108278482	170.048	77.9642	0.458484	0.0443444	Down	solute carrier family 22 member 6-like
slc25a27	50.1887	24.3994	0.486154	0.0419978	Down	solute carrier family 25 member 27
slc34a1	73.8296	23.458	0.317732	0.0015594	Down	solute carrier family 34 member 1
LOC108277861	33.7916	13.5963	0.402358	0.0323589	Down	solute carrier family 35 member F2-like
slc8a3	53.1936	19.6144	0.368735	0.00253355	Down	solute carrier family 8 member A3
LOC108273452	45.3356	18.3969	0.405793	0.0142582	Down	somatostatin receptor type 5-like
snx20	84.6443	36.8689	0.435575	0.00159349	Down	sorting nexin 20
spdya	14.3727	0	0	2.28407e-05	Down	speedy/RINGO cell cycle regulator family member A
LOC108263138	280.886	1.81793	0.00647212	8.05098e-17	Down	sperm acrosome membrane-associated protein 4-like
sat1	2509.84	956.302	0.381021	2.13015e-14	Down	spermidine/spermine N1-acetyltransferase 1
smpdl3b	938.909	334.8	0.356584	0.00126574	Down	sphingomyelin phosphodiesterase acid like 3B
LOC108273228	887.064	426.553	0.48086	1.7363e-08	Down	sphingosine 1-phosphate receptor 1-like
ska1	69.6113	30.1489	0.433103	0.00429358	Down	spindle and kinetochore associated complex subunit 1
LOC108265781	41.4288	9.96044	0.240423	0.000190523	Down	spindlin-W-like
sqle	77.8592	30.817	0.395805	0.000694911	Down	squalene epoxidase
LOC108275527	52.9522	11.7161	0.221258	7.45578e-06	Down	SRSF protein kinase 3-like
LOC108260946	59.8464	20.1996	0.337524	0.000391312	Down	sterile alpha motif domain-containing protein 9-like
LOC108261565	70.9996	33.9647	0.478378	0.0218768	Down	sterol 26-hydroxylase, mitochondrial-like
LOC108261587	52.1019	26.0159	0.499327	0.0429025	Down	stonustoxin subunit alpha-like
smc1a	105.762	44.6788	0.422448	0.000331049	Down	structural maintenance of chromosomes 1A
LOC108263323	3055.58	95.9677	0.0314074	0.00427515	Down	struthiocalcin-1-like
LOC108281065	3839.91	1908.13	0.496919	3.51956e-09	Down	supervillin-like
LOC108258328	115.821	22.0439	0.190327	2.16831e-10	Down	suppressor of cytokine signaling 1-like
LOC108255553	432.102	204.082	0.4723	8.67859e-06	Down	sushi domain-containing protein 1-like
srpx	248.332	88.2237	0.355265	7.55842e-10	Down	sushi repeat containing protein, X-linked
LOC108255535	39.6085	10.8384	0.273639	0.000989455	Down	synaptobrevin homolog 1-like
syce3	39.5533	1.49704	0.0378488	6.12628e-11	Down	synaptonemal complex central element protein 3
LOC108274328	576.865	286.603	0.496829	7.03322e-05	Down	synaptopodin 2-like protein
LOC108260996	617.892	275.181	0.445354	1.86014e-05	Down	synaptopodin-2-like
tapbp	1129.59	552.636	0.489238	1.99949e-08	Down	TAP binding protein (tapasin)
LOC108259085	445.868	181.468	0.406999	8.26865e-10	Down	T-cell-specific surface glycoprotein CD28-like
tnmd	191.877	37.8083	0.197044	2.69944e-17	Down	tenomodulin
topaz1	10.6248	1.19828	0.112781	0.0253167	Down	testis and ovary specific PAZ domain containing 1
tspan12	176.32	78.6986	0.44634	3.04114e-05	Down	tetraspanin 12
LOC108279233	5003.75	1568.08	0.313381	1.27403e-08	Down	thread biopolymer filament subunit alpha-like
LOC108267402	4428.88	1840.89	0.415657	0.00159049	Down	thread biopolymer filament subunit gamma-like
LOC108274281	933.237	416.564	0.446365	3.6771e-10	Down	thrombospondin-2-like
LOC108272910	43.118	19.6089	0.454773	0.034742	Down	thrombospondin-3b-like
trabd2a	97.351	38.3189	0.393616	0.000146034	Down	TraB domain containing 2A
LOC108269926	860.933	357.178	0.414873	1.16419e-11	Down	transcription elongation factor A protein 3-like
LOC108273187	66.7744	26.8511	0.402116	0.0356669	Down	transcription factor 23-like
LOC108276406	341.732	160.897	0.470828	1.75057e-06	Down	transcription factor ETV6-like
LOC108275587	38.51	16.6395	0.432082	0.0370839	Down	transcription factor HES-5-like
LOC100305039	126.639	1.81104	0.0143008	2.40675e-05	Down	transcription factor IIIA
LOC108258340	10.5041	1.20516	0.114733	0.0258132	Down	transcription factor LBX1-like
LOC108258144	14.9842	1.50451	0.100407	0.00291327	Down	transcription initiation factor TFIID subunit 4-like
tgfbi	975.632	407.772	0.417957	3.23915e-11	Down	transforming growth factor beta induced
tm7sf2	242.07	106.811	0.441241	8.7818e-05	Down	transmembrane 7 superfamily member 2
LOC108269147	102.098	31.4177	0.307722	8.90289e-07	Down	transmembrane emp24 domain-containing protein 6-like
LOC108259861	32.0788	0.598701	0.0186634	7.5014e-06	Down	transmembrane protease serine 4-like
LOC108279931	127.739	0.9127	0.00714505	1.22525e-13	Down	transmembrane protease serine 9-like
tmem182	424.567	203.243	0.478706	0.000275106	Down	transmembrane protein 182
LOC108269177	91.2692	22.3958	0.245382	2.9801e-08	Down	transmembrane protein 182-like
LOC108272418	150.172	67.4397	0.449082	9.42171e-05	Down	transmembrane protein 182-like
tmem38a	4857.27	2267.95	0.466918	0.00135793	Down	transmembrane protein 38A
tmem44	109.604	52.8726	0.482397	0.0019678	Down	transmembrane protein 44
tap1	961.243	472.487	0.491538	3.77503e-08	Down	transporter 1, ATP binding cassette subfamily B member
LOC108257580	145.313	45.0674	0.310141	1.13824e-08	Down	tripartite motif-containing protein 16-like
LOC108257761	495.37	245.573	0.495736	0.000183371	Down	tripartite motif-containing protein 16-like
LOC108258553	46.6069	13.8463	0.297086	0.000912758	Down	tripartite motif-containing protein 16-like
LOC108258557	1362	492.668	0.361724	1.5381e-16	Down	tripartite motif-containing protein 16-like
LOC108278018	48.3406	22.9451	0.474656	0.0351566	Down	tripartite motif-containing protein 16-like
LOC108264362	100.818	17.624	0.174809	8.37721e-06	Down	tripartite motif-containing protein 35-like
LOC108266899	326.367	157.809	0.483531	3.89944e-06	Down	tripartite motif-containing protein 35-like
tmod1	626.53	306.492	0.489191	2.82317e-06	Down	tropomodulin 1
LOC108276716	9484.49	4556.06	0.48037	1.54408e-10	Down	tropomyosin beta chain
LOC108275548	1394.19	315.217	0.226092	0.000417397	Down	troponin C, skeletal muscle
tnni1	322.869	66.525	0.206043	1.0378e-09	Down	troponin I slow skeletal muscle
LOC108275295	744.46	240.301	0.322786	1.29994e-09	Down	troponin I, fast skeletal muscle-like
LOC108275296	6400.27	2409.42	0.376456	1.22881e-08	Down	troponin I, fast skeletal muscle-like
LOC108275297	31576.7	14435.6	0.457162	3.12579e-09	Down	troponin I, fast skeletal muscle-like
LOC108280151	505.248	211.641	0.418885	9.73614e-10	Down	troponin I, slow skeletal muscle-like
LOC108280528	1517.88	577.544	0.380493	0.000185828	Down	troponin T, slow skeletal muscle-like
tnnt2	209.617	67.2205	0.320681	0.000297145	Down	troponin T2, cardiac type
LOC108268680	26.8073	4.82007	0.179804	0.000709385	Down	trypsin inhibitor ClTI-1-like
LOC108272227	2884.65	1277.97	0.443025	3.67675e-12	Down	trypsin-like
LOC108256914	99.8363	0	0	2.63768e-05	Down	tubulin alpha-8 chain-like
LOC108277165	76.0636	28.0436	0.368686	0.00377173	Down	tubulin beta chain-like
tubb	1722.6	786.048	0.456314	1.35737e-07	Down	tubulin beta class I
LOC108262309	35.4878	13.5535	0.381921	0.0232591	Down	tubulin beta-4B chain-like
tdrd1	23.4466	2.41721	0.103094	9.34919e-05	Down	tudor domain containing 1
tdrd15	19.5331	0	0	1.90474e-07	Down	tudor domain containing 15
tdrd5	28.663	5.70406	0.199004	0.032081	Down	tudor domain containing 5
tdrd6	36.7281	1.19799	0.0326176	1.25434e-10	Down	tudor domain containing 6
tdrd9	30.49	0.905813	0.0297086	4.02499e-09	Down	tudor domain containing 9
LOC108260559	44.2621	8.42266	0.190291	0.0286104	Down	tudor domain-containing protein 7A-like
tnfsf13b	44.1714	16.0356	0.363032	0.00462241	Down	tumor necrosis factor superfamily member 13b
LOC108277448	78.2777	37.1881	0.475079	0.00600915	Down	tumor necrosis factor-like
LOC108267808	99.4899	49.0253	0.492767	0.00385731	Down	tyrosine-protein kinase Lyn-like
LOC108264986	296.21	142.608	0.481444	9.01379e-06	Down	tyrosine-protein kinase ZAP-70
ubxn10	34.7175	10.2583	0.295481	0.00379797	Down	UBX domain protein 10
LOC108259975	834.631	344.559	0.412829	6.60916e-09	Down	UDP-glucuronosyltransferase 2C1-like
LOC108259976	63.0933	25.9961	0.412026	0.00379797	Down	UDP-glucuronosyltransferase 2C1-like
LOC108259980	42.8386	17.789	0.415255	0.0181562	Down	UDP-glucuronosyltransferase 2C1-like
LOC108268039	50.5927	19.6583	0.38856	0.00485104	Down	UMP-CMP kinase-like
LOC108267577	407.257	97.6238	0.23971	2.40949e-21	Down	uncharacterized abhydrolase domain-containing protein DDB_G0269086-like
LOC108254720	46.7524	16.3126	0.348914	0.0231838	Down	uncharacterized LOC108254720
LOC108254896	17.0258	0	0	6.75484e-05	Down	uncharacterized LOC108254896
LOC108255580	80.3536	33.4549	0.416346	0.00101192	Down	uncharacterized LOC108255580
LOC108256088	69.5592	16.0758	0.231109	1.07706e-06	Down	uncharacterized LOC108256088
LOC108256254	53.0558	0.898926	0.016943	5.53712e-08	Down	uncharacterized LOC108256254
LOC108256336	3412.82	1073.67	0.314601	8.86132e-24	Down	uncharacterized LOC108256336
LOC108256399	52.9488	20.8276	0.393353	0.00517968	Down	uncharacterized LOC108256399
LOC108256418	84.7369	38.0959	0.449579	0.00231039	Down	uncharacterized LOC108256418
LOC108257994	203.406	2.73092	0.013426	1.20095e-15	Down	uncharacterized LOC108257994
LOC108258220	54.4402	23.6268	0.433995	0.0108728	Down	uncharacterized LOC108258220
LOC108258404	41.1112	8.17753	0.198913	3.28034e-05	Down	uncharacterized LOC108258404
LOC108258484	105.402	0	0	2.07158e-08	Down	uncharacterized LOC108258484
LOC108258732	155.613	68.3774	0.439406	0.000537781	Down	uncharacterized LOC108258732
LOC108258758	35.3467	10.8929	0.308174	0.00973024	Down	uncharacterized LOC108258758
LOC108258949	145.557	67.852	0.466154	0.000209459	Down	uncharacterized LOC108258949
LOC108259000	135.298	29.6466	0.219121	2.74172e-12	Down	uncharacterized LOC108259000
LOC108259009	47.8367	11.171	0.233524	4.26479e-05	Down	uncharacterized LOC108259009
LOC108259354	350.61	123.98	0.35361	7.92636e-11	Down	uncharacterized LOC108259354
LOC108259561	327.879	138.611	0.422751	1.43601e-05	Down	uncharacterized LOC108259561
LOC108259634	498.81	222.218	0.445497	1.59616e-08	Down	uncharacterized LOC108259634
LOC108259741	333.714	0.299642	0.0008979	6.30433e-16	Down	uncharacterized LOC108259741
LOC108259807	752.176	105.948	0.140855	2.77052e-15	Down	uncharacterized LOC108259807
LOC108259990	37.6468	11.5011	0.305501	0.0378311	Down	uncharacterized LOC108259990
LOC108260416	181.922	70.2478	0.386142	6.29949e-05	Down	uncharacterized LOC108260416
LOC108260621	55.2213	17.198	0.311438	0.000302633	Down	uncharacterized LOC108260621
LOC108260624	918.046	279.598	0.304558	1.91146e-17	Down	uncharacterized LOC108260624
LOC108260625	6043.09	1498.18	0.247917	1.20811e-13	Down	uncharacterized LOC108260625
LOC108261444	8.17585	0.306529	0.037492	0.0169643	Down	uncharacterized LOC108261444
LOC108261623	110.048	53.7174	0.488126	0.0200997	Down	uncharacterized LOC108261623
LOC108261678	77.2932	29.3162	0.379285	0.000288361	Down	uncharacterized LOC108261678
LOC108261792	58.9448	21.4828	0.364457	0.00107639	Down	uncharacterized LOC108261792
LOC108262000	8.79087	0	0	0.00262999	Down	uncharacterized LOC108262000
LOC108262139	119.334	19.9975	0.167577	3.13824e-14	Down	uncharacterized LOC108262139
LOC108262588	342.061	0.299642	0.000875989	1.47854e-11	Down	uncharacterized LOC108262588
LOC108262767	394.302	181.259	0.459696	0.000663425	Down	uncharacterized LOC108262767
LOC108263466	142.966	33.7449	0.236033	1.88303e-06	Down	uncharacterized LOC108263466
LOC108263503	78.9171	0.912408	0.0115616	2.5002e-08	Down	uncharacterized LOC108263503
LOC108263507	10.5975	0	0	0.0005607	Down	uncharacterized LOC108263507
LOC108263796	59.5143	28.6351	0.481147	0.024072	Down	uncharacterized LOC108263796
LOC108263802	203.126	64.3615	0.316855	0.000489426	Down	uncharacterized LOC108263802
LOC108263951	253.837	68.5334	0.26999	9.14675e-07	Down	uncharacterized LOC108263951
LOC108264746	9644.8	3611.88	0.37449	1.58696e-18	Down	uncharacterized LOC108264746
LOC108265078	166.459	47.8139	0.287241	1.6737e-10	Down	uncharacterized LOC108265078
LOC108265481	14239.4	3949.63	0.277372	1.38647e-30	Down	uncharacterized LOC108265481
LOC108265687	67.9737	32.9771	0.485144	0.0139499	Down	uncharacterized LOC108265687
LOC108265768	15.1222	0.29935	0.0197954	5.97043e-05	Down	uncharacterized LOC108265768
LOC108266275	15.0639	0.905813	0.0601314	0.022325	Down	uncharacterized LOC108266275
LOC108266429	152.268	72.1636	0.473924	0.000215737	Down	uncharacterized LOC108266429
LOC108266702	83.2865	25.9614	0.311711	9.14056e-06	Down	uncharacterized LOC108266702
LOC108267231	72.8883	25.325	0.34745	0.0139105	Down	uncharacterized LOC108267231
LOC108267492	480.278	212.412	0.442268	6.04098e-06	Down	uncharacterized LOC108267492
LOC108267494	183	88.395	0.483032	0.000125855	Down	uncharacterized LOC108267494
LOC108267516	224.781	101.29	0.450619	0.000114009	Down	uncharacterized LOC108267516
LOC108267564	67.6737	26.1496	0.386407	0.0296216	Down	uncharacterized LOC108267564
LOC108268214	20.6354	1.19857	0.058083	0.00119231	Down	uncharacterized LOC108268214
LOC108269373	323.106	116.656	0.361047	1.23196e-10	Down	uncharacterized LOC108269373
LOC108269387	110.829	22.0905	0.19932	1.75279e-11	Down	uncharacterized LOC108269387
LOC108269518	871.185	0.29935	0.000343613	4.73918e-17	Down	uncharacterized LOC108269518
LOC108270585	48.451	14.5311	0.299914	0.000457254	Down	uncharacterized LOC108270585
LOC108270819	109.324	48.1944	0.440842	0.000484109	Down	uncharacterized LOC108270819
LOC108271079	182.132	77.2502	0.424144	0.000128185	Down	uncharacterized LOC108271079
LOC108271500	611.267	231.673	0.379004	4.20367e-05	Down	uncharacterized LOC108271500
LOC108272473	29.7331	0	0	0.000200796	Down	uncharacterized LOC108272473
LOC108272981	199.389	68.2952	0.342523	0.0396437	Down	uncharacterized LOC108272981
LOC108272983	72.7306	35.0593	0.482044	0.0326384	Down	uncharacterized LOC108272983
LOC108272984	115.614	35.2806	0.305158	9.02895e-05	Down	uncharacterized LOC108272984
LOC108273451	73.8713	0	0	1.83449e-07	Down	uncharacterized LOC108273451
LOC108273474	144.988	3.90708	0.0269476	3.67675e-12	Down	uncharacterized LOC108273474
LOC108274578	146.423	63.7144	0.435138	0.000181505	Down	uncharacterized LOC108274578
LOC108275351	63.9779	27.8634	0.435516	0.00787301	Down	uncharacterized LOC108275351
LOC108275706	796.04	309.891	0.389291	0.00041237	Down	uncharacterized LOC108275706
LOC108275795	1157.29	564.829	0.488061	0.0260523	Down	uncharacterized LOC108275795
LOC108276434	358.108	8.49153	0.0237122	3.36919e-14	Down	uncharacterized LOC108276434
LOC108276474	74.0321	36.7807	0.496821	0.0470099	Down	uncharacterized LOC108276474
LOC108277470	254.116	123.405	0.485626	0.000874945	Down	uncharacterized LOC108277470
LOC108277473	55.4522	21.6697	0.390781	0.0266662	Down	uncharacterized LOC108277473
LOC108277732	247.966	89.0365	0.359067	1.76231e-09	Down	uncharacterized LOC108277732
LOC108278522	10.0483	0	0	0.000815672	Down	uncharacterized LOC108278522
LOC108278550	11.3296	0.898635	0.0793172	0.00864036	Down	uncharacterized LOC108278550
LOC108279195	159.622	55.5505	0.348013	3.9482e-07	Down	uncharacterized LOC108279195
LOC108279266	332.799	114.182	0.343096	2.11698e-07	Down	uncharacterized LOC108279266
LOC108279298	270.549	55.7133	0.205927	1.61115e-05	Down	uncharacterized LOC108279298
LOC108279608	45.1494	18.458	0.408821	0.0261378	Down	uncharacterized LOC108279608
LOC108280017	96.7301	22.0327	0.227775	2.56489e-09	Down	uncharacterized LOC108280017
LOC108280027	306.096	137.996	0.450827	0.000730701	Down	uncharacterized LOC108280027
LOC108280222	317.399	0	0	1.10898e-12	Down	uncharacterized LOC108280222
LOC108280326	40.8524	16.3838	0.401048	0.023229	Down	uncharacterized LOC108280326
LOC108278920	180.237	89.1247	0.494485	0.000271687	Down	uncharacterized PE-PGRS family protein PE_PGRS54-like
LOC108268546	1628.03	457.333	0.280912	4.26124e-21	Down	uncharacterized protein C10orf71-like
LOC108259294	110.122	40.1147	0.364275	7.03322e-05	Down	uncharacterized protein C17orf53-like
LOC108267198	12.4418	1.49704	0.120324	0.0144473	Down	uncharacterized serine-rich protein C215.13-like
LOC108275015	67.6355	26.7495	0.395495	0.00140046	Down	UPF0583 protein C15orf59 homolog
ucma	519.829	202.944	0.390406	0.0381731	Down	upper zone of growth plate and cartilage matrix associated
LOC108269832	266.03	104.584	0.393128	0.0351566	Down	up-regulator of cell proliferation-like
LOC108269833	104.885	48.2971	0.460478	0.00197308	Down	up-regulator of cell proliferation-like
urad	135.599	38.0465	0.280581	2.41139e-09	Down	ureidoimidazoline (2-oxo-4-hydroxy-4-carboxy-5-) decarboxylase
uric	1479.1	566.529	0.383023	2.21276e-10	Down	uricase
LOC108275486	367.551	67.2124	0.182866	8.52709e-27	Down	urokinase plasminogen activator surface receptor-like
LOC108276002	108.568	30.1655	0.277849	3.78674e-08	Down	urokinase plasminogen activator surface receptor-like
LOC108276151	1151.84	524.122	0.455029	0.0155218	Down	urokinase plasminogen activator surface receptor-like
LOC108258649	7980.06	2798.24	0.350654	1.42587e-07	Down	UTP--glucose-1-phosphate uridylyltransferase-like
LOC108258298	14885.4	5646.57	0.379335	0.000730701	Down	verrucotoxin subunit beta-like
LOC108258304	18299.3	7084	0.387119	0.0012982	Down	verrucotoxin subunit beta-like
LOC108261931	178.731	5.43313	0.0303983	1.95159e-39	Down	versican core protein-like
LOC108280320	174.882	36.2496	0.20728	1.61847e-15	Down	very-long-chain enoyl-CoA reductase-like
LOC108255780	124.222	53.1232	0.427647	0.00010429	Down	vesicle-associated membrane protein 3-like
LOC108271345	38.9731	12.3435	0.316719	0.00341402	Down	vitamin D 25-hydroxylase
LOC108256085	3004.45	968.21	0.322259	0.045796	Down	vitelline membrane outer layer protein 1 homolog
LOC108278693	3592.55	660.422	0.183831	1.36111e-12	Down	vitelline membrane outer layer protein 1-like
LOC108278695	123.603	28.0359	0.226823	0.000157413	Down	vitelline membrane outer layer protein 1-like
LOC108278696	386.767	109.062	0.281983	0.0349953	Down	vitelline membrane outer layer protein 1-like
LOC108262203	15.6371	0.299642	0.0191623	0.0184857	Down	vitellogenin-like
LOC108262356	6.65274	0	0	0.0166822	Down	vitellogenin-like
LOC108270632	42.1653	0.905521	0.0214755	7.73926e-06	Down	vitellogenin-like
vtn	9131.95	4196.81	0.459575	0.0481429	Down	vitronectin
LOC108273131	567.422	181.732	0.320276	2.72372e-16	Down	voltage-dependent calcium channel gamma-1 subunit-like
LOC108261451	173.975	59.1881	0.340211	1.83002e-08	Down	von Willebrand factor A domain-containing protein 5A-like
LOC108274583	210.613	66.0971	0.313832	9.18274e-11	Down	von Willebrand factor A domain-containing protein 5A-like
LOC108263484	324.087	139.179	0.429449	0.000339267	Down	von Willebrand factor A domain-containing protein 7-like
LOC108263485	889.332	348.161	0.391486	0.00293269	Down	von Willebrand factor A domain-containing protein 7-like
wap65-1	224801	65038	0.289313	0.000139411	Down	warm temperature acclimation protein 65 KDa-1
wee2	45.1666	0.598701	0.0132554	3.33221e-10	Down	WEE1 homolog 2 (S. pombe)
wisp3	27.9752	9.65362	0.345078	0.0302645	Down	WNT1 inducible signaling pathway protein 3
LOC108260676	530.908	248.146	0.467399	8.70569e-08	Down	wolframin-like
znf326	159.257	2.0972	0.0131687	5.31416e-13	Down	zinc finger protein 326
LOC108268299	22.48	0.306529	0.0136357	0.00254815	Down	zinc finger protein 36, C3H1 type-like 2
LOC108267392	540.747	262.362	0.485185	4.38802e-07	Down	zinc finger protein 467-like
LOC108280136	150.415	68.1569	0.453127	0.000118215	Down	zinc finger protein 800-like
zglp1	50.9314	1.19799	0.0235215	2.43667e-15	Down	zinc finger, GATA-like protein 1
LOC108263607	72.8591	9.05521	0.124284	7.85086e-05	Down	zinc transporter 10-like
LOC108256652	77.6214	24.7355	0.318669	2.21575e-05	Down	zinc-binding protein A33-like
LOC108256874	179.47	37.0914	0.206671	1.11987e-15	Down	zinc-binding protein A33-like
LOC108256253	84.047	0	0	7.37592e-11	Down	zona pellucida sperm-binding protein 3-like
LOC108258640	644.695	0.912408	0.00141526	3.40221e-11	Down	zona pellucida sperm-binding protein 3-like
LOC108258641	587.901	0.898635	0.00152855	5.99962e-09	Down	zona pellucida sperm-binding protein 3-like
LOC108259382	1371.4	0.306529	0.000223515	3.21434e-15	Down	zona pellucida sperm-binding protein 3-like
LOC108259392	3404.59	1.1974	0.000351702	3.33177e-25	Down	zona pellucida sperm-binding protein 3-like
LOC108259405	2154.12	1.5114	0.000701633	8.42262e-17	Down	zona pellucida sperm-binding protein 3-like
LOC108259421	1204	1.20458	0.00100048	6.36314e-26	Down	zona pellucida sperm-binding protein 3-like
LOC108259431	1929.25	0.898343	0.000465644	1.42539e-19	Down	zona pellucida sperm-binding protein 3-like
LOC108259441	1838.95	0.912408	0.000496157	5.05528e-25	Down	zona pellucida sperm-binding protein 3-like
LOC108259447	945.774	0.29935	0.000316514	5.09564e-18	Down	zona pellucida sperm-binding protein 3-like
LOC108259456	1538.99	1.20487	0.000782898	2.59017e-22	Down	zona pellucida sperm-binding protein 3-like
LOC108259470	1145.54	0.598701	0.000522638	5.96157e-31	Down	zona pellucida sperm-binding protein 3-like
LOC108259539	15.4679	0.598993	0.038725	0.00245952	Down	zona pellucida sperm-binding protein 3-like
LOC108260148	13.4126	0.599284	0.0446808	0.000799295	Down	zona pellucida sperm-binding protein 3-like
LOC108267342	562.76	4.5279	0.00804587	5.47297e-13	Down	zona pellucida sperm-binding protein 3-like
LOC108256939	806.805	0.898635	0.00111382	1.40036e-13	Down	zona pellucida sperm-binding protein 4-like
LOC108261768	332.424	2.39655	0.00720932	7.85104e-22	Down	zona pellucida sperm-binding protein 4-like
LOC108270576	308.11	0.898343	0.00291565	4.21514e-14	Down	zona pellucida sperm-binding protein 4-like
LOC108270587	547.403	0.306529	0.000559969	1.45716e-12	Down	zona pellucida sperm-binding protein 4-like
LOC108272692	138.478	0.613058	0.00442712	1.31984e-10	Down	zona pellucida sperm-binding protein 4-like
LOC108277534	2099.26	4.52644	0.00215621	1.24273e-13	Down	zona pellucida sperm-binding protein 4-like
LOC108278042	548.819	0.29935	0.000545445	9.43546e-18	Down	zona pellucida sperm-binding protein 4-like
LOC108278043	401.676	0.29935	0.000745254	1.94389e-10	Down	zona pellucida sperm-binding protein 4-like
LOC108278044	731.897	1.1974	0.00163603	9.75192e-14	Down	zona pellucida sperm-binding protein 4-like
LOC108278045	485.755	0	0	1.03984e-18	Down	zona pellucida sperm-binding protein 4-like
LOC108278046	940.519	0.605879	0.000644197	5.11645e-22	Down	zona pellucida sperm-binding protein 4-like
LOC108278047	5675.37	115.342	0.0203233	6.79431e-08	Down	zona pellucida sperm-binding protein 4-like
LOC108278048	1146.95	1.80328	0.00157223	6.92679e-28	Down	zona pellucida sperm-binding protein 4-like
LOC108278358	13.2676	0	0	7.0464e-05	Down	zona pellucida sperm-binding protein 4-like
zar1	340.515	4.8063	0.0141148	2.82598e-08	Down	zygote arrest 1
zar1l	195.789	0	0	2.45668e-09	Down	zygote arrest 1-like
